# Supplementary material for: Comparative Quantitative Proteomic Analysis Reveals Differentially Expressed Proteins Involved in Grain-Filling Rate of Rice at the Early Ripening Stage
Source: Research Square preprint supplement (doi:10.21203/rs.3.rs-112831/v1), 2020-11-24
Supplement: Supplementary file 1 [file 61327312ccd23989d59de49e.xlsx]

## Sheet: C1 vs C2
Suppl. Table 2: Detailed information about identified differentially expressed grain proteins at 3 days after heading between two rice cultivars, Xiangzaoxian 24 and Xiangzaoxian 42.
Protein ID	Protein description	Regulated Type	Gene name	Score	Coverage [%]	Peptides	PSMs	Unique peptides	Subcellular localization	Biological Process	Cellular Component	Molecular Function	KEGG KO No.	KEGG Gene	KEGG pathway	IPR ID	Domain description
A2WK48	Bowman-Birk type bran trypsin inhibitor	Down	OsI_00197	19.409	19.5	6	8	5	extracellular	GO:0052548 regulation of endopeptidase activity; GO:0050794 regulation of cellular process; GO:0010951 negative regulation of endopeptidase activity; GO:0045861 negative regulation of proteolysis; GO:0080090 regulation of primary metabolic process; GO:0060255 regulation of macromolecule metabolic process; GO:0048523 negative regulation of cellular process; GO:0048519 negative regulation of biolog…	GO:0005576 extracellular region;	GO:0004867 serine-type endopeptidase inhibitor activity; GO:0030234 enzyme regulator activity; GO:0030414 peptidase inhibitor activity; GO:0061134 peptidase regulator activity; GO:0061135 endopeptidase regulator activity; GO:0098772 molecular function regulator; GO:0004857 enzyme inhibitor activity; GO:0004866 endopeptidase inhibitor activity;				IPR000877;	Proteinase inhibitor I12, Bowman-Birk;
A2WN16	flowering-promoting factor 1-like protein 1	Down	OsI_01240	19.103	11.9	1	1	1	chloroplast
A2WN71	UBP1-associated protein 2A	Down	OsI_01299	89.41	30.4	10	17	9	chloroplast			GO:0097159 organic cyclic compound binding; GO:1901363 heterocyclic compound binding; GO:1901265 nucleoside phosphate binding; GO:0005488 binding; GO:0003676 nucleic acid binding; GO:0000166 nucleotide binding; GO:0036094 small molecule binding;	K12741	HNRNPA1_3; heterogeneous nuclear ribonucleoprotein A1/A3	osa03040 Spliceosome - Oryza sativa japonica (Japanese rice) (RefSeq);	IPR000504; IPR012677;	RNA recognition motif domain; Nucleotide-binding alpha-beta plait domain;
A2WNB4	cysteine proteinase inhibitor 12	Down	OsI_01339	3.3134	17.6	1	1	1	cytoplasm	GO:0052548 regulation of endopeptidase activity; GO:0050794 regulation of cellular process; GO:0010951 negative regulation of endopeptidase activity; GO:0045861 negative regulation of proteolysis; GO:0080090 regulation of primary metabolic process; GO:0060255 regulation of macromolecule metabolic process; GO:0048523 negative regulation of cellular process; GO:0048519 negative regulation of biolog…		GO:0061135 endopeptidase regulator activity; GO:0004857 enzyme inhibitor activity; GO:0098772 molecular function regulator; GO:0030234 enzyme regulator activity; GO:0004866 endopeptidase inhibitor activity; GO:0004869 cysteine-type endopeptidase inhibitor activity; GO:0030414 peptidase inhibitor activity; GO:0061134 peptidase regulator activity;
A2WNE9	embryonic protein DC-8	Down	OsI_01378	14.841	17	2	2	2	mitochondria
A2WPK5	LYR motif-containing protein At3g19508	Down	OsI_01786	15.019	48.8	4	4	4	chloroplast
A2WQ51	glutathione S-transferase 1	Down	OsI_01983	58.558	49.5	10	16	9	chloroplast			GO:0005515 protein binding; GO:0005488 binding;	K00799	GST, gst; glutathione S-transferase [EC:2.5.1.18]	osa00480 Glutathione metabolism - Oryza sativa japonica (Japanese rice) (RefSeq);	IPR010987; IPR004046; IPR004045; IPR012336; IPR034347;	Glutathione S-transferase, C-terminal-like; Glutathione S-transferase, C-terminal; Glutathione S-transferase, N-terminal; Thioredoxin-like fold; Glutathione S-transferases Phi, C-terminal;
A2WS06	nucleolin-like isoform X4 [Setaria italica]	Up	OsI_02645	22.233	12.1	4	4	4	peroxisome
A2WTA3	protein trichome birefringence-like 38	Down	OsI_03091	12.712	9.9	3	3	3	chloroplast							IPR025846;	PMR5 N-terminal domain;
A2WV88	phosphoenolpyruvate carboxylase, housekeeping isozyme	Down	OsI_03803	11.795	22.2	18	27	5	cytoplasm	GO:0072350 tricarboxylic acid metabolic process; GO:0055114 oxidation-reduction process; GO:0044281 small molecule metabolic process; GO:0044763 single-organism cellular process; GO:0006099 tricarboxylic acid cycle; GO:0044699 single-organism process; GO:0044238 primary metabolic process; GO:0045333 cellular respiration; GO:0044237 cellular metabolic process; GO:0071704 organic substance metaboli…		GO:0016831 carboxy-lyase activity; GO:0016829 lyase activity; GO:0008964 phosphoenolpyruvate carboxylase activity; GO:0003824 catalytic activity; GO:0016830 carbon-carbon lyase activity; GO:0004611 phosphoenolpyruvate carboxykinase activity;	K01595	ppc; phosphoenolpyruvate carboxylase [EC:4.1.1.31]	osa00620 Pyruvate metabolism - Oryza sativa japonica (Japanese rice) (RefSeq); osa00710 Carbon fixation in photosynthetic organisms - Oryza sativa japonica (Japanese rice) (RefSeq); osa01100 Metabolic pathways - Oryza sativa japonica (Japanese rice) (RefSeq); osa01200 Carbon metabolism - Oryza sativa japonica (Japanese rice) (RefSeq);	IPR015813;	Pyruvate/Phosphoenolpyruvate kinase-like domain;
A2WVM2	cysteine-rich receptor-like protein kinase 15	Down	OsI_03942	14.078	20.2	4	4	4	chloroplast		GO:0031224 intrinsic component of membrane; GO:0016020 membrane; GO:0016021 integral component of membrane; GO:0044425 membrane part;					IPR002902;	Gnk2-homologous domain;
A2WW14	protein LIM3-like [Aegilops tauschii subsp. tauschii]	Up	OsI_04093	68.716	52.7	6	15	6	extracellular							IPR016140;	Bifunctional inhibitor/plant lipid transfer protein/seed storage helical domain;
A2WY68	glycine-rich cell wall structural protein 1.8	Down	OsI_04875	12.314	10	3	3	3	peroxisome
A2WYC7	Uncharacterized protein OS=Oryza sativa subsp. indica OX=39946 GN=OsI_04931	Down	OsI_04931	7.4239	12.7	4	4	4	chloroplast							IPR032308;	Jas TPL-binding domain;
A2WYW8	eukaryotic peptide chain release factor subunit 1-3	Up	OsI_05132	31.048	21.6	8	19	2	cytoplasm	GO:0016043 cellular component organization; GO:0006518 peptide metabolic process; GO:0044267 cellular protein metabolic process; GO:0044699 single-organism process; GO:0009058 biosynthetic process; GO:1901566 organonitrogen compound biosynthetic process; GO:0044237 cellular metabolic process; GO:0071704 organic substance metabolic process; GO:0043241 protein complex disassembly; GO:0008152 metabo…	GO:0044424 intracellular part; GO:0005623 cell; GO:0044464 cell part; GO:0005622 intracellular; GO:0005737 cytoplasm;	GO:0097159 organic cyclic compound binding; GO:0008079 translation termination factor activity; GO:1901363 heterocyclic compound binding; GO:0003723 RNA binding; GO:0008135 translation factor activity, RNA binding; GO:0005488 binding; GO:0003676 nucleic acid binding; GO:0016149 translation release factor activity, codon specific; GO:0003747 translation release factor activity;	K03265	ETF1, ERF1; peptide chain release factor subunit 1	osa03015 mRNA surveillance pathway - Oryza sativa japonica (Japanese rice) (RefSeq);	IPR005141; IPR029064; IPR005142; IPR005140; IPR024049;	eRF1 domain 2; 50S ribosomal protein L30e-like; eRF1 domain 3; eRF1 domain 1/Pelota-like; Peptide Chain Release Factor eRF1/aRF1, N-terminal;
A2WZ71	Uncharacterized protein OS=Oryza sativa subsp. indica OX=39946 GN=OsI_05241	Down	OsI_05241	47.014	65.5	6	12	6	nucleus
A2X0W1	Uncharacterized protein OS=Oryza sativa subsp. indica OX=39946 GN=OsI_05846	Up	OsI_05846	42.395	24.7	6	8	6	chloroplast
A2X1H8	60S ribosomal protein L27a-3	Down	OsI_06059	10.017	54.2	7	32	2	nucleus	GO:0006518 peptide metabolic process; GO:0043043 peptide biosynthetic process; GO:0044267 cellular protein metabolic process; GO:0006807 nitrogen compound metabolic process; GO:0009058 biosynthetic process; GO:0043603 cellular amide metabolic process; GO:0044238 primary metabolic process; GO:1901566 organonitrogen compound biosynthetic process; GO:1901576 organic substance biosynthetic process; G…	GO:0005840 ribosome; GO:0043229 intracellular organelle; GO:0043232 intracellular non-membrane-bounded organelle; GO:0044446 intracellular organelle part; GO:0005737 cytoplasm; GO:0032991 macromolecular complex; GO:0044424 intracellular part; GO:0005623 cell; GO:0044422 organelle part; GO:0043228 non-membrane-bounded organelle; GO:0043226 organelle; GO:0015934 large ribosomal subunit; GO:0044391 …	GO:0003735 structural constituent of ribosome; GO:0005198 structural molecule activity;	K02900	RP-L27Ae, RPL27A; large subunit ribosomal protein L27Ae	osa03010 Ribosome - Oryza sativa japonica (Japanese rice) (RefSeq);	IPR021131;	Ribosomal protein L18e/L15P;
A2X1S4	kynurenine formamidase	Down	OsI_06152	15.924	13.5	4	8	4	plasma membrane	GO:1901606 alpha-amino acid catabolic process; GO:0006725 cellular aromatic compound metabolic process; GO:0044699 single-organism process; GO:0044237 cellular metabolic process; GO:0071704 organic substance metabolic process; GO:0006576 cellular biogenic amine metabolic process; GO:0044270 cellular nitrogen compound catabolic process; GO:0008152 metabolic process; GO:0006520 cellular amino acid …		GO:0016787 hydrolase activity; GO:0016811 hydrolase activity, acting on carbon-nitrogen (but not peptide) bonds, in linear amides; GO:0004061 arylformamidase activity; GO:0003824 catalytic activity; GO:0016810 hydrolase activity, acting on carbon-nitrogen (but not peptide) bonds;
A2X1S8	protein TIC 21, chloroplastic	Up	OsI_06156	3.4035	5.5	2	3	2	chloroplast		GO:0031224 intrinsic component of membrane; GO:0016020 membrane; GO:0016021 integral component of membrane; GO:0044425 membrane part;
A2X288	Glycosyltransferase OS=Oryza sativa subsp. indica OX=39946 GN=OsI_06312	Up	OsI_06312	68.198	17.2	6	10	6	cytoplasm	GO:0008152 metabolic process;		GO:0016757 transferase activity, transferring glycosyl groups; GO:0016758 transferase activity, transferring hexosyl groups; GO:0003824 catalytic activity; GO:0016740 transferase activity;
A2X2I8	ATP-dependent RNA helicase DRS1 isoform X1	Down	OsI_06407	16.078	7.4	6	8	5	nucleus			GO:0005524 ATP binding; GO:1901265 nucleoside phosphate binding; GO:0001882 nucleoside binding; GO:0043167 ion binding; GO:0000166 nucleotide binding; GO:0097159 organic cyclic compound binding; GO:1901363 heterocyclic compound binding; GO:0032549 ribonucleoside binding; GO:0097367 carbohydrate derivative binding; GO:0032553 ribonucleotide binding; GO:0005488 binding; GO:0003676 nucleic acid bind…	K03257	EIF4A; translation initiation factor 4A	osa03013 RNA transport - Oryza sativa japonica (Japanese rice) (RefSeq);	IPR011545; IPR027417; IPR014001; IPR025558; IPR001650;	DEAD/DEAH box helicase domain; P-loop containing nucleoside triphosphate hydrolase; Helicase superfamily 1/2, ATP-binding domain; Domain of unknown function DUF4283; Helicase, C-terminal;
A2X2V3	Glycosyltransferase OS=Oryza sativa subsp. indica OX=39946 GN=OsI_06519	Up	OsI_06519	3.173	11.4	3	4	1	cytoplasm	GO:0008152 metabolic process;		GO:0016757 transferase activity, transferring glycosyl groups; GO:0016758 transferase activity, transferring hexosyl groups; GO:0003824 catalytic activity; GO:0016740 transferase activity;	K08237	E2.4.1.218; hydroquinone glucosyltransferase [EC:2.4.1.218]
A2X2Z1	glutelin type-B 2-like	Up	OsI_06564	175.22	47.3	26	80	21	extracellular			GO:0045735 nutrient reservoir activity;				IPR011051; IPR006045; IPR014710;	RmlC-like cupin domain; Cupin 1; RmlC-like jelly roll fold;
A2X5E1	Uncharacterized protein OS=Oryza sativa subsp. indica OX=39946 GN=OsI_07417	Down	OsI_07417	2.3556	5.9	1	1	1	chloroplast
A2X5L0	copper transport protein ATX1	Down	OsI_07492	21.486	31.8	3	8	3	chloroplast	GO:0006810 transport; GO:0051179 localization; GO:0006812 cation transport; GO:0030001 metal ion transport; GO:0006811 ion transport; GO:0051234 establishment of localization;		GO:0046872 metal ion binding; GO:0043169 cation binding; GO:0005488 binding; GO:0043167 ion binding;	K07213	ATOX1, ATX1, copZ, golB; copper chaperone		IPR006121;	Heavy metal-associated domain, HMA;
A2X6E8	Uncharacterized protein OS=Oryza sativa subsp. indica OX=39946 GN=OsI_07786	Down	OsI_07786	1.7321	5.8	1	1	1	chloroplast
A2X6M5	Glycosyltransferase OS=Oryza sativa subsp. indica OX=39946 GN=OsI_07863	Down	OsI_07863	8.0679	9.6	2	2	2	chloroplast	GO:0008152 metabolic process;		GO:0016757 transferase activity, transferring glycosyl groups; GO:0016758 transferase activity, transferring hexosyl groups; GO:0003824 catalytic activity; GO:0016740 transferase activity;
A2X6W1	ent-isokaurene C2-hydroxylase-like	Down	OsI_07951	15.275	6.9	2	3	1	chloroplast	GO:0044699 single-organism process; GO:0008152 metabolic process; GO:0055114 oxidation-reduction process; GO:0044710 single-organism metabolic process;	GO:0031224 intrinsic component of membrane; GO:0016020 membrane; GO:0016021 integral component of membrane; GO:0044425 membrane part;	GO:0097159 organic cyclic compound binding; GO:1901363 heterocyclic compound binding; GO:0020037 heme binding; GO:0005506 iron ion binding; GO:0046914 transition metal ion binding; GO:0003824 catalytic activity; GO:0005488 binding; GO:0043167 ion binding; GO:0043169 cation binding; GO:0046872 metal ion binding; GO:0016705 oxidoreductase activity, acting on paired donors, with incorporation or red…
A2X7Z9	putative expansin-B14	Up	OsI_08348	10.233	17.2	4	5	4	chloroplast	GO:0019953 sexual reproduction; GO:0000003 reproduction; GO:0022414 reproductive process; GO:0051704 multi-organism process; GO:0044703 multi-organism reproductive process;	GO:0005576 extracellular region;					IPR009009; IPR007112; IPR007117;	RlpA-like protein, double-psi beta-barrel domain; Expansin/pollen allergen, DPBB domain; Expansin, cellulose-binding-like domain;
A2X9B7	probable peroxygenase 5	Down	OsI_08835	11.337	17	3	4	3	chloroplast				K17991	PXG; peroxygenase [EC:1.11.2.3]	osa00073 Cutin, suberine and wax biosynthesis - Oryza sativa japonica (Japanese rice) (RefSeq);
A2XAH3	protein TPLATE	Down	OsI_09253	1.8012	11.3	9	12	1	chloroplast			GO:0005488 binding;				IPR011989; IPR016024;	Armadillo-like helical; Armadillo-type fold;
A2XB21	magnesium transporter MgtE isoform X1 [Brachypodium distachyon]	Up	OsI_09454	5.7475	9	2	3	2	chloroplast			GO:0003824 catalytic activity;				IPR013785; IPR000644;	Aldolase-type TIM barrel; CBS domain;
A2XBN8	putative DUF1618 domain containing family protein isoform X1 [Zea mays]	Down	OsI_09700	2.9832	2.7	1	1	1	nucleus							IPR011676;	Domain of unknown function DUF1618;
A2XBP4	cytochrome P450 84A1	Down	OsI_09706	14.68	10.2	4	4	4	chloroplast	GO:0044699 single-organism process; GO:0008152 metabolic process; GO:0055114 oxidation-reduction process; GO:0044710 single-organism metabolic process;	GO:0031224 intrinsic component of membrane; GO:0016020 membrane; GO:0016021 integral component of membrane; GO:0044425 membrane part;	GO:0097159 organic cyclic compound binding; GO:1901363 heterocyclic compound binding; GO:0020037 heme binding; GO:0005506 iron ion binding; GO:0046914 transition metal ion binding; GO:0003824 catalytic activity; GO:0005488 binding; GO:0043167 ion binding; GO:0016705 oxidoreductase activity, acting on paired donors, with incorporation or reduction of molecular oxygen; GO:0046872 metal ion binding;…	K09755	CYP84A, F5H; ferulate-5-hydroxylase [EC:1.14.-.-]	osa00940 Phenylpropanoid biosynthesis - Oryza sativa japonica (Japanese rice) (RefSeq); osa01100 Metabolic pathways - Oryza sativa japonica (Japanese rice) (RefSeq); osa01110 Biosynthesis of secondary metabolites - Oryza sativa japonica (Japanese rice) (RefSeq);
A2XBX9	probable receptor-like protein kinase At5g24010	Up	OsI_09796	44.73	12.9	4	4	4	plasma membrane		GO:0031224 intrinsic component of membrane; GO:0016020 membrane; GO:0016021 integral component of membrane; GO:0044425 membrane part;					IPR024788;	Malectin-like carbohydrate-binding domain;
A2XC45	HVA22-like protein OS=Oryza sativa subsp. indica OX=39946 GN=OsI_09866	Up	OsI_09866	2.6678	4.2	1	1	1	extracellular		GO:0016020 membrane;
A2XC53	chitin elicitor-binding protein	Up	OsI_09873	12.427	9	2	3	2	chloroplast			GO:0005515 protein binding; GO:0043621 protein self-association; GO:0005488 binding;	K13473	CEBIP; chitin elicitor-binding protein	osa04626 Plant-pathogen interaction - Oryza sativa japonica (Japanese rice) (RefSeq);	IPR018392;	LysM domain;
A2XC94	pre-mRNA-splicing factor cwf23	Down	OsI_09919	5.5469	5.1	1	1	1	nucleus			GO:0097159 organic cyclic compound binding; GO:1901363 heterocyclic compound binding; GO:1901265 nucleoside phosphate binding; GO:0005488 binding; GO:0003676 nucleic acid binding; GO:0000166 nucleotide binding; GO:0036094 small molecule binding;	K09537	DNAJC17; DnaJ homolog subfamily C member 17		IPR000504; IPR001623; IPR012677;	RNA recognition motif domain; DnaJ domain; Nucleotide-binding alpha-beta plait domain;
A2XD59	lipase 1 isoform X1	Down	OsI_10245	8.4744	8.2	2	4	2	chloroplast							IPR029058; IPR000073;	Alpha/Beta hydrolase fold; Alpha/beta hydrolase fold-1;
A2XE16	glucan endo-1,3-beta-glucosidase 3 isoform X1	Up	OsI_10562	23.644	8.3	3	6	3	plasma membrane	GO:0008152 metabolic process; GO:0005975 carbohydrate metabolic process; GO:0044238 primary metabolic process; GO:0071704 organic substance metabolic process;		GO:0004553 hydrolase activity, hydrolyzing O-glycosyl compounds; GO:0016787 hydrolase activity; GO:0003824 catalytic activity; GO:0016798 hydrolase activity, acting on glycosyl bonds;	K19891	GN1_2_3; glucan endo-1,3-beta-glucosidase 1/2/3 [EC:3.2.1.39]	osa00500 Starch and sucrose metabolism - Oryza sativa japonica (Japanese rice) (RefSeq);	IPR012946; IPR017853; IPR013781;	X8 domain; Glycoside hydrolase superfamily; Glycoside hydrolase, catalytic domain;
A2XEI9	Uncharacterized protein OS=Oryza sativa subsp. indica OX=39946 GN=OsI_10745	Down	OsI_10745	16.525	11.8	5	8	5	chloroplast							IPR011676;	Domain of unknown function DUF1618;
A2XEJ1	Uncharacterized protein OS=Oryza sativa subsp. indica OX=39946 GN=Sc-ib2	Down	Sc-ib2	12.023	14.4	6	6	6	cytoplasm							IPR011676;	Domain of unknown function DUF1618;
A2XEZ0	tropinone reductase homolog At5g06060 isoform X1	Up	OsI_10905	11.953	23.8	7	7	4	chloroplast	GO:0044699 single-organism process; GO:0008152 metabolic process; GO:0055114 oxidation-reduction process; GO:0044710 single-organism metabolic process;	GO:0031224 intrinsic component of membrane; GO:0016020 membrane; GO:0016021 integral component of membrane; GO:0044425 membrane part;	GO:0003824 catalytic activity; GO:0016491 oxidoreductase activity;	K08081	TR1; tropinone reductase I [EC:1.1.1.206]	osa00960 Tropane, piperidine and pyridine alkaloid biosynthesis - Oryza sativa japonica (Japanese rice) (RefSeq); osa01100 Metabolic pathways - Oryza sativa japonica (Japanese rice) (RefSeq); osa01110 Biosynthesis of secondary metabolites - Oryza sativa japonica (Japanese rice) (RefSeq);	IPR016040;	NAD(P)-binding domain;
A2XFT1	universal stress protein A-like protein isoform X2	Down	OsI_11226	12.749	22.3	5	6	5	chloroplast	GO:0006950 response to stress; GO:0050896 response to stimulus;						IPR014729; IPR006016;	Rossmann-like alpha/beta/alpha sandwich fold; UspA;
A2XH60	BETL-9 protein precursor [Zea mays]	Up	OsI_11735	42.252	55.3	6	22	6	chloroplast							IPR016140;	Bifunctional inhibitor/plant lipid transfer protein/seed storage helical domain;
A2XH76	transmembrane protein, putative [Medicago truncatula]	Up	OsI_11750	4.9936	5.7	1	1	1	chloroplast		GO:0031224 intrinsic component of membrane; GO:0016020 membrane; GO:0016021 integral component of membrane; GO:0044425 membrane part;
A2XHT7	probable nucleoredoxin 1-1	Down	OsI_11974	75.919	27.6	13	26	9	cytoplasm	GO:0050794 regulation of cellular process; GO:0042592 homeostatic process; GO:0065008 regulation of biological quality; GO:0050789 regulation of biological process; GO:0045454 cell redox homeostasis; GO:0044763 single-organism cellular process; GO:0019725 cellular homeostasis; GO:0044699 single-organism process; GO:0009987 cellular process; GO:0065007 biological regulation;	GO:0005623 cell;		K17609	NXN; nucleoredoxin [EC:1.8.1.8]		IPR004146; IPR013766; IPR012336;	DC1; Thioredoxin domain; Thioredoxin-like fold;
A2XHV1	60S ribosomal protein L27a-3	Up	OsI_11989	38.933	54.8	8	35	3	nucleus	GO:0006518 peptide metabolic process; GO:0043043 peptide biosynthetic process; GO:0044267 cellular protein metabolic process; GO:0006807 nitrogen compound metabolic process; GO:0009058 biosynthetic process; GO:0043603 cellular amide metabolic process; GO:0044238 primary metabolic process; GO:1901566 organonitrogen compound biosynthetic process; GO:1901576 organic substance biosynthetic process; G…	GO:0005840 ribosome; GO:0043229 intracellular organelle; GO:0043232 intracellular non-membrane-bounded organelle; GO:0044446 intracellular organelle part; GO:0005737 cytoplasm; GO:0032991 macromolecular complex; GO:0044424 intracellular part; GO:0005623 cell; GO:0044422 organelle part; GO:0043228 non-membrane-bounded organelle; GO:0043226 organelle; GO:0015934 large ribosomal subunit; GO:0044391 …	GO:0003735 structural constituent of ribosome; GO:0005198 structural molecule activity;	K02900	RP-L27Ae, RPL27A; large subunit ribosomal protein L27Ae	osa03010 Ribosome - Oryza sativa japonica (Japanese rice) (RefSeq);	IPR021131;	Ribosomal protein L18e/L15P;
A2XIU7	Ribosomal protein L19 OS=Oryza sativa subsp. indica OX=39946 GN=OsI_12360	Up	OsI_12360	16.131	28.2	5	13	2	nucleus	GO:0006518 peptide metabolic process; GO:0043043 peptide biosynthetic process; GO:0044267 cellular protein metabolic process; GO:0006807 nitrogen compound metabolic process; GO:0009058 biosynthetic process; GO:0043603 cellular amide metabolic process; GO:0044238 primary metabolic process; GO:1901566 organonitrogen compound biosynthetic process; GO:1901576 organic substance biosynthetic process; G…	GO:0005840 ribosome; GO:0043229 intracellular organelle; GO:0043232 intracellular non-membrane-bounded organelle; GO:0022625 cytosolic large ribosomal subunit; GO:0044446 intracellular organelle part; GO:0005737 cytoplasm; GO:0032991 macromolecular complex; GO:0044424 intracellular part; GO:0005829 cytosol; GO:0005623 cell; GO:0044422 organelle part; GO:0043228 non-membrane-bounded organelle; GO:…	GO:0003735 structural constituent of ribosome; GO:0005198 structural molecule activity;	K02885	RP-L19e, RPL19; large subunit ribosomal protein L19e	osa03010 Ribosome - Oryza sativa japonica (Japanese rice) (RefSeq);	IPR000196; IPR015974; IPR033935; IPR015972;	Ribosomal protein L19/L19e; Ribosomal protein L19/L19e, domain 3; Ribosomal protein L19, eukaryotic; Ribosomal protein L19/L19e, domain 1;
A2XJB6	glycerophosphodiester phosphodiesterase GDPD6-like [Oryza brachyantha]	Down	OsI_12541	10.618	10.4	2	3	2	extracellular	GO:0044699 single-organism process; GO:0008152 metabolic process; GO:0044238 primary metabolic process; GO:0044710 single-organism metabolic process; GO:0006629 lipid metabolic process; GO:0071704 organic substance metabolic process;		GO:0008081 phosphoric diester hydrolase activity; GO:0016787 hydrolase activity; GO:0003824 catalytic activity; GO:0042578 phosphoric ester hydrolase activity; GO:0016788 hydrolase activity, acting on ester bonds;	K01126	E3.1.4.46, glpQ, ugpQ; glycerophosphoryl diester phosphodiesterase [EC:3.1.4.46]	osa00564 Glycerophospholipid metabolism - Oryza sativa japonica (Japanese rice) (RefSeq);	IPR030395; IPR017946;	Glycerophosphodiester phosphodiesterase domain; PLC-like phosphodiesterase, TIM beta/alpha-barrel domain;
A2XJL0	naringenin,2-oxoglutarate 3-dioxygenase	Up	OsI_12626	29.184	21.3	7	8	7	cytoplasm	GO:0044699 single-organism process; GO:0008152 metabolic process; GO:0055114 oxidation-reduction process; GO:0044710 single-organism metabolic process;		GO:0046872 metal ion binding; GO:0043169 cation binding; GO:0003824 catalytic activity; GO:0005488 binding; GO:0016491 oxidoreductase activity; GO:0043167 ion binding;				IPR005123; IPR027443; IPR026992;	Oxoglutarate/iron-dependent dioxygenase; Isopenicillin N synthase-like; Non-haem dioxygenase N-terminal domain;
A2XK24	ornithine aminotransferase, mitochondrial	Down	OsI_12793	2.9099	40.5	3	7	1	mitochondria			GO:0097159 organic cyclic compound binding; GO:1901363 heterocyclic compound binding; GO:0016769 transferase activity, transferring nitrogenous groups; GO:0003824 catalytic activity; GO:0005488 binding; GO:0043167 ion binding; GO:0043168 anion binding; GO:0008483 transaminase activity; GO:0016740 transferase activity; GO:0048037 cofactor binding; GO:0030170 pyridoxal phosphate binding;	K00819	rocD, OAT; ornithine--oxo-acid transaminase [EC:2.6.1.13]	osa00330 Arginine and proline metabolism - Oryza sativa japonica (Japanese rice) (RefSeq); osa01100 Metabolic pathways - Oryza sativa japonica (Japanese rice) (RefSeq); osa01110 Biosynthesis of secondary metabolites - Oryza sativa japonica (Japanese rice) (RefSeq);	IPR015424; IPR015422;	Pyridoxal phosphate-dependent transferase; Pyridoxal phosphate-dependent transferase, major region, subdomain 2;
A2XKG3	deoxyuridine 5'-triphosphate nucleotidohydrolase	Down	OsI_12940	45.006	51.7	5	7	5	cytoplasm	GO:0006725 cellular aromatic compound metabolic process; GO:0046080 dUTP metabolic process; GO:0009147 pyrimidine nucleoside triphosphate metabolic process; GO:0009117 nucleotide metabolic process; GO:0044699 single-organism process; GO:0009200 deoxyribonucleoside triphosphate metabolic process; GO:0009394 2'-deoxyribonucleotide metabolic process; GO:0009262 deoxyribonucleotide metabolic process;…		GO:0047429 nucleoside-triphosphate diphosphatase activity; GO:0016817 hydrolase activity, acting on acid anhydrides; GO:0016787 hydrolase activity; GO:0016462 pyrophosphatase activity; GO:0016818 hydrolase activity, acting on acid anhydrides, in phosphorus-containing anhydrides; GO:0003824 catalytic activity; GO:0004170 dUTP diphosphatase activity;	K01520	dut, DUT; dUTP pyrophosphatase [EC:3.6.1.23]	osa00240 Pyrimidine metabolism - Oryza sativa japonica (Japanese rice) (RefSeq); osa01100 Metabolic pathways - Oryza sativa japonica (Japanese rice) (RefSeq);	IPR033704; IPR029054;	dUTPase, trimeric; dUTPase-like;
A2XKL2	ATP-dependent RNA helicase A	Up	OsI_12992	27.527	23.8	3	4	3	extracellular
A2XKW9	Glycosyltransferase OS=Oryza sativa subsp. indica OX=39946 GN=OsI_13108	Down	OsI_13108	14.838	16.6	5	5	5	chloroplast	GO:0008152 metabolic process;		GO:0016757 transferase activity, transferring glycosyl groups; GO:0016758 transferase activity, transferring hexosyl groups; GO:0003824 catalytic activity; GO:0016740 transferase activity;	K13692	IAGLU; UDP-glucose:(indol-3-yl)acetate beta-D-glucosyltransferase [EC:2.4.1.121]
A2XNV4	protein TolB	Down	OsI_14253	13.155	5.4	3	3	3	chloroplast							IPR011042;	Six-bladed beta-propeller, TolB-like;
A2XNZ2	GDSL esterase/lipase At3g48460	Up	OsI_14292	29.094	25.7	6	11	6	extracellular			GO:0016787 hydrolase activity; GO:0003824 catalytic activity; GO:0016788 hydrolase activity, acting on ester bonds;				IPR001087; IPR013830;	GDSL lipase/esterase; SGNH hydrolase-type esterase domain;
A2XP71	PAX3- and PAX7-binding protein 1	Down	OsI_14375	5.4562	4	3	3	3	chloroplast	GO:0050794 regulation of cellular process; GO:0010468 regulation of gene expression; GO:0006355 regulation of transcription, DNA-templated; GO:0031326 regulation of cellular biosynthetic process; GO:0080090 regulation of primary metabolic process; GO:0060255 regulation of macromolecule metabolic process; GO:0019219 regulation of nucleobase-containing compound metabolic process; GO:0010556 regulat…	GO:0043226 organelle; GO:0043231 intracellular membrane-bounded organelle; GO:0043229 intracellular organelle; GO:0005634 nucleus; GO:0044464 cell part; GO:0005622 intracellular; GO:0044424 intracellular part; GO:0043227 membrane-bounded organelle; GO:0005623 cell;	GO:0097159 organic cyclic compound binding; GO:1901363 heterocyclic compound binding; GO:0003677 DNA binding; GO:0005488 binding; GO:0001071 nucleic acid binding transcription factor activity; GO:0003676 nucleic acid binding; GO:0003700 transcription factor activity, sequence-specific DNA binding;	K13211	GCFC; GC-rich sequence DNA-binding factor		IPR022783;	GC-rich sequence DNA-binding factor domain;
A2XRR0	UDP-glycosyltransferase 90A1	Up	OsI_15314	7.74	14	3	3	3	cytoplasm	GO:0008152 metabolic process;		GO:0016757 transferase activity, transferring glycosyl groups; GO:0016758 transferase activity, transferring hexosyl groups; GO:0003824 catalytic activity; GO:0016740 transferase activity;
A2XUH9	probable amino acid permease 7 isoform X2	Up	OsI_16261	2.8645	4.1	2	2	2	plasma membrane		GO:0031224 intrinsic component of membrane; GO:0016020 membrane; GO:0016021 integral component of membrane; GO:0044425 membrane part;					IPR013057;	Amino acid transporter, transmembrane domain;
A2XYC1	probable isoaspartyl peptidase/L-asparaginase 2	Up	OsI_17700	23.627	20.7	6	6	6	cytoplasm			GO:0016787 hydrolase activity; GO:0003824 catalytic activity;	K13051	iaaA, ASRGL1; beta-aspartyl-peptidase (threonine type) [EC:3.4.19.5]		IPR029055;	Nucleophile aminohydrolases, N-terminal;
A2XYI5	cysteine-rich repeat secretory protein 38	Down	OsI_17759	3.4488	10.9	2	2	2	chloroplast							IPR002902;	Gnk2-homologous domain;
A2XZF2	transmembrane protein, putative [Medicago truncatula]	Up	OsI_18101	1.8636	14.1	1	1	1	chloroplast		GO:0031224 intrinsic component of membrane; GO:0016020 membrane; GO:0016021 integral component of membrane; GO:0044425 membrane part;
A2Y1D1	lachrymatory-factor synthase	Up	OsI_18815	5.2056	14.7	3	3	3	mitochondria							IPR023393;	START-like domain;
A2Y1U9	isoflavone reductase homolog	Down	OsI_18981	88.331	28.7	7	15	5	chloroplast				K21568	PLR; pinoresinol/lariciresinol reductase [EC:1.23.1.1 1.23.1.2 1.23.1.3 1.23.1.4]	osa00999 Biosynthesis of secondary metabolites - unclassified - Oryza sativa japonica (Japanese rice) (RefSeq); osa01110 Biosynthesis of secondary metabolites - Oryza sativa japonica (Japanese rice) (RefSeq);	IPR016040; IPR008030;	NAD(P)-binding domain; NmrA-like domain;
A2Y1X6	putative disease resistance RPP13-like protein 3	Down	OsI_19009	2.0437	1.2	1	1	1	nucleus			GO:1901265 nucleoside phosphate binding; GO:0001882 nucleoside binding; GO:0043167 ion binding; GO:0000166 nucleotide binding; GO:0097159 organic cyclic compound binding; GO:1901363 heterocyclic compound binding; GO:0032549 ribonucleoside binding; GO:0097367 carbohydrate derivative binding; GO:0032553 ribonucleotide binding; GO:0005488 binding; GO:0032550 purine ribonucleoside binding; GO:0043531…				IPR002182; IPR027417; IPR032675;	NB-ARC; P-loop containing nucleoside triphosphate hydrolase; Leucine-rich repeat domain, L domain-like;
A2Y215	Uncharacterized protein OS=Oryza sativa subsp. indica OX=39946 GN=OsI_19048	Down	OsI_19048	9.253	13.9	4	5	4	chloroplast
A2Y261	Aldose 1-epimerase OS=Oryza sativa subsp. indica OX=39946 GN=OsI_19092	Down	OsI_19092	45.035	30.8	8	11	1	cytoplasm	GO:0044723 single-organism carbohydrate metabolic process; GO:0008152 metabolic process; GO:0044710 single-organism metabolic process; GO:0044281 small molecule metabolic process; GO:0005996 monosaccharide metabolic process; GO:0044699 single-organism process; GO:0044238 primary metabolic process; GO:0005975 carbohydrate metabolic process; GO:0019318 hexose metabolic process; GO:0071704 organic s…		GO:0016853 isomerase activity; GO:0003824 catalytic activity; GO:0016854 racemase and epimerase activity; GO:0016857 racemase and epimerase activity, acting on carbohydrates and derivatives; GO:0005488 binding; GO:0030246 carbohydrate binding; GO:0004034 aldose 1-epimerase activity;	K01785	galM, GALM; aldose 1-epimerase [EC:5.1.3.3]	osa00010 Glycolysis / Gluconeogenesis - Oryza sativa japonica (Japanese rice) (RefSeq); osa00052 Galactose metabolism - Oryza sativa japonica (Japanese rice) (RefSeq); osa01100 Metabolic pathways - Oryza sativa japonica (Japanese rice) (RefSeq); osa01110 Biosynthesis of secondary metabolites - Oryza sativa japonica (Japanese rice) (RefSeq);	IPR011013; IPR014718;	Galactose mutarotase-like domain; Glycoside hydrolase-type carbohydrate-binding;
A2Y375	trans-cinnamate 4-monooxygenase	Up	OsI_19463	111.02	46.4	19	35	19	cytoplasm	GO:0044699 single-organism process; GO:0008152 metabolic process; GO:0055114 oxidation-reduction process; GO:0044710 single-organism metabolic process;		GO:0097159 organic cyclic compound binding; GO:1901363 heterocyclic compound binding; GO:0020037 heme binding; GO:0005506 iron ion binding; GO:0046914 transition metal ion binding; GO:0003824 catalytic activity; GO:0005488 binding; GO:0043167 ion binding; GO:0016705 oxidoreductase activity, acting on paired donors, with incorporation or reduction of molecular oxygen; GO:0043169 cation binding; GO…	K00487	CYP73A; trans-cinnamate 4-monooxygenase [EC:1.14.13.11]	osa00130 Ubiquinone and other terpenoid-quinone biosynthesis - Oryza sativa japonica (Japanese rice) (RefSeq); osa00360 Phenylalanine metabolism - Oryza sativa japonica (Japanese rice) (RefSeq); osa00940 Phenylpropanoid biosynthesis - Oryza sativa japonica (Japanese rice) (RefSeq); osa00941 Flavonoid biosynthesis - Oryza sativa japonica (Japanese rice) (RefSeq); osa00945 Stilbenoid, diarylheptano…
A2Y3C8	hepatocyte growth factor-regulated tyrosine kinase substrate	Up	OsI_19514	5.1075	4.4	2	2	2	nucleus	GO:0045184 establishment of protein localization; GO:0006810 transport; GO:0046907 intracellular transport; GO:0070727 cellular macromolecule localization; GO:0051649 establishment of localization in cell; GO:0006886 intracellular protein transport; GO:0071702 organic substance transport; GO:0008104 protein localization; GO:0033036 macromolecule localization; GO:0034613 cellular protein localizat…	GO:0005623 cell; GO:0005622 intracellular; GO:0044464 cell part;					IPR002014; IPR004152; IPR008942;	VHS domain; GAT domain; ENTH/VHS;
A2Y3J8	3-ketoacyl-CoA synthase OS=Oryza sativa subsp. indica OX=39946 GN=OsI_19580	Up	OsI_19580	8.594	9.9	4	4	3	chloroplast	GO:0044711 single-organism biosynthetic process; GO:0016053 organic acid biosynthetic process; GO:0044281 small molecule metabolic process; GO:0044763 single-organism cellular process; GO:0044699 single-organism process; GO:0044255 cellular lipid metabolic process; GO:0009058 biosynthetic process; GO:0006631 fatty acid metabolic process; GO:0044238 primary metabolic process; GO:0044237 cellular m…	GO:0031224 intrinsic component of membrane; GO:0016020 membrane; GO:0016021 integral component of membrane; GO:0044425 membrane part;	GO:0016746 transferase activity, transferring acyl groups; GO:0016747 transferase activity, transferring acyl groups other than amino-acyl groups; GO:0003824 catalytic activity; GO:0016740 transferase activity;	K15397	KCS; 3-ketoacyl-CoA synthase [EC:2.3.1.199]	osa00062 Fatty acid elongation - Oryza sativa japonica (Japanese rice) (RefSeq); osa01100 Metabolic pathways - Oryza sativa japonica (Japanese rice) (RefSeq); osa01110 Biosynthesis of secondary metabolites - Oryza sativa japonica (Japanese rice) (RefSeq);	IPR016039; IPR013747; IPR013601;	Thiolase-like; 3-Oxoacyl-[acyl-carrier-protein (ACP)] synthase III, C-terminal; FAE1/Type III polyketide synthase-like protein;
A2Y4F6	chitinase 9	Down	OsI_19884	3.7613	3	1	1	1	extracellular	GO:1901071 glucosamine-containing compound metabolic process; GO:0006030 chitin metabolic process; GO:0044036 cell wall macromolecule metabolic process; GO:0006026 aminoglycan catabolic process; GO:1901136 carbohydrate derivative catabolic process; GO:0006807 nitrogen compound metabolic process; GO:0006032 chitin catabolic process; GO:0005975 carbohydrate metabolic process; GO:0044238 primary met…		GO:0004553 hydrolase activity, hydrolyzing O-glycosyl compounds; GO:0016787 hydrolase activity; GO:0008061 chitin binding; GO:0097367 carbohydrate derivative binding; GO:0004568 chitinase activity; GO:0003824 catalytic activity; GO:0005488 binding; GO:0016798 hydrolase activity, acting on glycosyl bonds;	K20547	CHIB; basic endochitinase B [EC:3.2.1.14]	osa00520 Amino sugar and nucleotide sugar metabolism - Oryza sativa japonica (Japanese rice) (RefSeq); osa01100 Metabolic pathways - Oryza sativa japonica (Japanese rice) (RefSeq); osa04016 MAPK signaling pathway - plant - Oryza sativa japonica (Japanese rice) (RefSeq);	IPR023346; IPR000726; IPR001002;	Lysozyme-like domain; Glycoside hydrolase, family 19, catalytic; Chitin-binding, type 1;
A2Y4I3	basic 7S globulin	Down	OsI_19910	4.7138	14.3	3	3	2	chloroplast	GO:0006508 proteolysis; GO:0008152 metabolic process; GO:0043170 macromolecule metabolic process; GO:0019538 protein metabolic process; GO:0044238 primary metabolic process; GO:0071704 organic substance metabolic process;		GO:0004175 endopeptidase activity; GO:0008233 peptidase activity; GO:0003824 catalytic activity; GO:0004190 aspartic-type endopeptidase activity; GO:0070011 peptidase activity, acting on L-amino acid peptides; GO:0016787 hydrolase activity; GO:0070001 aspartic-type peptidase activity;				IPR021109; IPR032861;	Aspartic peptidase domain; Xylanase inhibitor, N-terminal;
A2Y4Q8	Uncharacterized protein OS=Oryza sativa subsp. indica OX=39946 GN=OsI_19986	Up	OsI_19986	26.076	40.6	4	9	4	chloroplast		GO:0031224 intrinsic component of membrane; GO:0016020 membrane; GO:0016021 integral component of membrane; GO:0044425 membrane part;
A2Y7I6	thiamine monophosphate synthase [Medicago truncatula]	Down	OsI_21004	36.035	25.9	6	8	6	chloroplast			GO:0003824 catalytic activity;				IPR013785;	Aldolase-type TIM barrel;
A2Y7Y4	Carboxypeptidase OS=Oryza sativa subsp. indica OX=39946 GN=OsI_21150	Down	OsI_21150	41.154	20.4	8	10	8	extracellular	GO:0006508 proteolysis; GO:0008152 metabolic process; GO:0043170 macromolecule metabolic process; GO:0019538 protein metabolic process; GO:0044238 primary metabolic process; GO:0071704 organic substance metabolic process;		GO:0004180 carboxypeptidase activity; GO:0008233 peptidase activity; GO:0008238 exopeptidase activity; GO:0017171 serine hydrolase activity; GO:0003824 catalytic activity; GO:0008236 serine-type peptidase activity; GO:0070011 peptidase activity, acting on L-amino acid peptides; GO:0004185 serine-type carboxypeptidase activity; GO:0016787 hydrolase activity; GO:0070008 serine-type exopeptidase act…	K09645	CPVL; vitellogenic carboxypeptidase-like protein [EC:3.4.16.-]		IPR029058;	Alpha/Beta hydrolase fold;
A2Y839	probable receptor-like protein kinase At5g15080, partial [Oryza brachyantha]	Up	OsI_21210	43.488	15.6	5	6	5	nucleus	GO:0016310 phosphorylation; GO:0044267 cellular protein metabolic process; GO:0044238 primary metabolic process; GO:0044237 cellular metabolic process; GO:0006796 phosphate-containing compound metabolic process; GO:0071704 organic substance metabolic process; GO:0008152 metabolic process; GO:0006468 protein phosphorylation; GO:0006793 phosphorus metabolic process; GO:0044260 cellular macromolecul…		GO:0005524 ATP binding; GO:1901265 nucleoside phosphate binding; GO:0016773 phosphotransferase activity, alcohol group as acceptor; GO:0001882 nucleoside binding; GO:0043167 ion binding; GO:0004672 protein kinase activity; GO:0000166 nucleotide binding; GO:0097159 organic cyclic compound binding; GO:1901363 heterocyclic compound binding; GO:0032549 ribonucleoside binding; GO:0097367 carbohydrate …				IPR000719; IPR001245; IPR013320; IPR011009;	Protein kinase domain; Serine-threonine/tyrosine-protein kinase catalytic domain; Concanavalin A-like lectin/glucanase domain; Protein kinase-like domain;
A2Y922	Uncharacterized protein OS=Oryza sativa subsp. indica OX=39946 GN=OsI_21559	Up	OsI_21559	3.0674	3.1	1	1	1	cytoplasm
A2Y926	Proteasome subunit beta type OS=Oryza sativa subsp. indica OX=39946 GN=OsI_21564	Up	OsI_21564	18.955	54.5	12	29	2	cytoplasm	GO:0051603 proteolysis involved in cellular protein catabolic process; GO:0044265 cellular macromolecule catabolic process; GO:0044257 cellular protein catabolic process; GO:0044267 cellular protein metabolic process; GO:0044238 primary metabolic process; GO:0044237 cellular metabolic process; GO:0071704 organic substance metabolic process; GO:1901575 organic substance catabolic process; GO:00081…	GO:0043226 organelle; GO:0043231 intracellular membrane-bounded organelle; GO:0043229 intracellular organelle; GO:1902494 catalytic complex; GO:0005634 nucleus; GO:0000502 proteasome complex; GO:0044464 cell part; GO:0005622 intracellular; GO:0005737 cytoplasm; GO:0005839 proteasome core complex; GO:0032991 macromolecular complex; GO:0044424 intracellular part; GO:1905368 peptidase complex; GO:00…	GO:0004175 endopeptidase activity; GO:0004298 threonine-type endopeptidase activity; GO:0008233 peptidase activity; GO:0070003 threonine-type peptidase activity; GO:0003824 catalytic activity; GO:0070011 peptidase activity, acting on L-amino acid peptides; GO:0016787 hydrolase activity;	K02738	PSMB6; 20S proteasome subunit beta 1 [EC:3.4.25.1]	osa03050 Proteasome - Oryza sativa japonica (Japanese rice) (RefSeq);	IPR029055;	Nucleophile aminohydrolases, N-terminal;
A2Y9N3	leucoanthocyanidin dioxygenase, partial	Down	OsI_21782	55.933	33.3	11	11	11	chloroplast	GO:0044699 single-organism process; GO:0008152 metabolic process; GO:0055114 oxidation-reduction process; GO:0044710 single-organism metabolic process;		GO:0046872 metal ion binding; GO:0043169 cation binding; GO:0003824 catalytic activity; GO:0005488 binding; GO:0016491 oxidoreductase activity; GO:0043167 ion binding;				IPR027443; IPR005123; IPR026992;	Isopenicillin N synthase-like; Oxoglutarate/iron-dependent dioxygenase; Non-haem dioxygenase N-terminal domain;
A2YAR7	26.2 kDa heat shock protein, mitochondrial	Up	OsI_22183	28.132	29	7	13	6	chloroplast				K13993	HSP20; HSP20 family protein	osa04141 Protein processing in endoplasmic reticulum - Oryza sativa japonica (Japanese rice) (RefSeq);	IPR002068; IPR008978;	Alpha crystallin/Hsp20 domain; HSP20-like chaperone;
A2YBH2	Putative curvature thylakoid 1A OS=Oryza sativa subsp. indica OX=39946 GN=CURT1A	Up	CURT1A	55.508	19.9	3	6	3	chloroplast		GO:0016020 membrane; GO:0044464 cell part; GO:0005622 intracellular; GO:0044425 membrane part; GO:0009579 thylakoid; GO:0031224 intrinsic component of membrane; GO:0044424 intracellular part; GO:0005623 cell; GO:0016021 integral component of membrane;					IPR025564;	Cyanobacterial aminoacyl-tRNA synthetase, CAAD domain;
A2YDK2	cytoplasmic tRNA 2-thiolation protein [Arabidopsis thaliana]	Up	OsI_23191	3.3818	14.6	1	1	1	chloroplast
A2YDZ8	protodermal factor 1	Down	OsI_23340	48.832	34.4	7	14	7	chloroplast
A2YEZ0	Glycine cleavage system P protein OS=Oryza sativa subsp. indica OX=39946 GN=OsI_23687	Up	OsI_23687	161.68	23.7	19	38	4	mitochondria	GO:1901606 alpha-amino acid catabolic process; GO:0044699 single-organism process; GO:0006544 glycine metabolic process; GO:0044237 cellular metabolic process; GO:0071704 organic substance metabolic process; GO:0006546 glycine catabolic process; GO:0008152 metabolic process; GO:0006520 cellular amino acid metabolic process; GO:0044248 cellular catabolic process; GO:0009987 cellular process; GO:00…		GO:0016638 oxidoreductase activity, acting on the CH-NH2 group of donors; GO:0016642 oxidoreductase activity, acting on the CH-NH2 group of donors, disulfide as acceptor; GO:0003824 catalytic activity; GO:0004375 glycine dehydrogenase (decarboxylating) activity; GO:0016491 oxidoreductase activity;	K00281	GLDC, gcvP; glycine dehydrogenase [EC:1.4.4.2]	osa00260 Glycine, serine and threonine metabolism - Oryza sativa japonica (Japanese rice) (RefSeq); osa00630 Glyoxylate and dicarboxylate metabolism - Oryza sativa japonica (Japanese rice) (RefSeq); osa01100 Metabolic pathways - Oryza sativa japonica (Japanese rice) (RefSeq); osa01110 Biosynthesis of secondary metabolites - Oryza sativa japonica (Japanese rice) (RefSeq); osa01200 Carbon metabolis…	IPR015424; IPR015421;	Pyridoxal phosphate-dependent transferase; Pyridoxal phosphate-dependent transferase, major region, subdomain 1;
A2YHD4	Dirigent protein OS=Oryza sativa subsp. indica OX=39946 GN=OsI_24601	Up	OsI_24601	3.2243	5.1	1	2	1	chloroplast		GO:0048046 apoplast; GO:0005576 extracellular region;
A2YJG7	alpha-amylase/trypsin inhibitor	Up	OsI_25378	17.911	39.6	6	13	3	chloroplast	GO:0050794 regulation of cellular process; GO:0052548 regulation of endopeptidase activity; GO:0010951 negative regulation of endopeptidase activity; GO:0045861 negative regulation of proteolysis; GO:0080090 regulation of primary metabolic process; GO:0060255 regulation of macromolecule metabolic process; GO:0030162 regulation of proteolysis; GO:0031324 negative regulation of cellular metabolic p…		GO:0004867 serine-type endopeptidase inhibitor activity; GO:0019865 immunoglobulin binding; GO:0030234 enzyme regulator activity; GO:0005488 binding; GO:0044877 macromolecular complex binding; GO:0030414 peptidase inhibitor activity; GO:0061134 peptidase regulator activity; GO:0005515 protein binding; GO:0061135 endopeptidase regulator activity; GO:0098772 molecular function regulator; GO:0004857…				IPR013771; IPR016140;	Bifunctional trypsin/alpha-amylase inhibitor helical domain; Bifunctional inhibitor/plant lipid transfer protein/seed storage helical domain;
A2YMQ9	sodium/calcium exchanger family protein / calcium-binding EF hand family protein [Arabidopsis thaliana]	Down	OsI_26513	9.0141	8.8	4	4	4	plasma membrane	GO:0006810 transport; GO:0055085 transmembrane transport; GO:0051179 localization; GO:0051234 establishment of localization;	GO:0031224 intrinsic component of membrane; GO:0016020 membrane; GO:0016021 integral component of membrane; GO:0044425 membrane part;	GO:0043169 cation binding; GO:0046872 metal ion binding; GO:0005509 calcium ion binding; GO:0005488 binding; GO:0043167 ion binding;				IPR004837; IPR011992; IPR002048;	Sodium/calcium exchanger membrane region; EF-hand domain pair; EF-hand domain;
A2YQ58	Nicotianamine synthase 3 OS=Oryza sativa subsp. indica OX=39946 GN=NAS3	Down	NAS3	6.964	9.6	3	3	3	chloroplast	GO:0030418 nicotianamine biosynthetic process; GO:0016053 organic acid biosynthetic process; GO:0044699 single-organism process; GO:0009058 biosynthetic process; GO:1901566 organonitrogen compound biosynthetic process; GO:0044237 cellular metabolic process; GO:0071704 organic substance metabolic process; GO:0006576 cellular biogenic amine metabolic process; GO:0008152 metabolic process; GO:004648…		GO:0030410 nicotianamine synthase activity; GO:0016765 transferase activity, transferring alkyl or aryl (other than methyl) groups; GO:0003824 catalytic activity; GO:0016740 transferase activity;	K05953	E2.5.1.43; nicotianamine synthase [EC:2.5.1.43]		IPR029063;	S-adenosyl-L-methionine-dependent methyltransferase;
A2YQV7	BTB/POZ and MATH domain-containing protein 3	Up	OsI_27684	23.634	8.9	3	3	3	cytoplasm			GO:0005515 protein binding; GO:0005488 binding;	K10523	SPOP; speckle-type POZ protein		IPR008974; IPR002083; IPR011333; IPR034090; IPR000210;	TRAF-like; MATH/TRAF domain; SKP1/BTB/POZ domain; BPM, C-terminal; BTB/POZ domain;
A2YTB2	early nodulin-like protein 3	Up	OsI_28556	16.639	28.5	5	16	5	chloroplast			GO:0009055 electron carrier activity;				IPR003245; IPR008972;	Phytocyanin domain; Cupredoxin;
A2YUL8	iron-sulfur assembly protein IscA-like 2, mitochondrial	Up	OsI_29023	7.5414	7.2	1	1	1	chloroplast	GO:0006790 sulfur compound metabolic process; GO:0044085 cellular component biogenesis; GO:0051188 cofactor biosynthetic process; GO:0016043 cellular component organization; GO:0009058 biosynthetic process; GO:0044238 primary metabolic process; GO:0044237 cellular metabolic process; GO:0044249 cellular biosynthetic process; GO:0051186 cofactor metabolic process; GO:0071704 organic substance metab…		GO:0005198 structural molecule activity; GO:0051536 iron-sulfur cluster binding; GO:0005488 binding; GO:0051540 metal cluster binding;	K22072	ISCA2; iron-sulfur cluster assembly 2		IPR000361;	FeS cluster biogenesis;
A2YUN0	major allergen Mal d 1	Up	OsI_29036	59.376	65.6	8	34	8	cytoplasm	GO:0006952 defense response; GO:0050896 response to stimulus; GO:0006950 response to stress; GO:0009607 response to biotic stimulus;						IPR023393; IPR000916;	START-like domain; Bet v I/Major latex protein;
A2YUW1	DIBOA-glucoside dioxygenase BX6	Down	OsI_29111	12.115	11.4	4	4	4	cytoplasm	GO:0044699 single-organism process; GO:0008152 metabolic process; GO:0055114 oxidation-reduction process; GO:0044710 single-organism metabolic process;		GO:0046872 metal ion binding; GO:0043169 cation binding; GO:0003824 catalytic activity; GO:0005488 binding; GO:0016491 oxidoreductase activity; GO:0043167 ion binding;				IPR027443; IPR005123; IPR026992;	Isopenicillin N synthase-like; Oxoglutarate/iron-dependent dioxygenase; Non-haem dioxygenase N-terminal domain;
A2YWE5	protein EXORDIUM-like 2	Down	OsI_29657	8.4449	9.1	3	4	3	chloroplast
A2YWS7	thylakoid lumenal 19 kDa protein, chloroplastic	Up	OsI_29793	16.589	16.5	4	7	4	chloroplast	GO:0008152 metabolic process; GO:0044237 cellular metabolic process; GO:0009987 cellular process; GO:0015979 photosynthesis;	GO:0016020 membrane; GO:0009523 photosystem II; GO:0019898 extrinsic component of membrane; GO:0098796 membrane protein complex; GO:0009654 photosystem II oxygen evolving complex; GO:0042651 thylakoid membrane; GO:0032991 macromolecular complex; GO:0044424 intracellular part; GO:0005623 cell; GO:0034357 photosynthetic membrane; GO:0009521 photosystem; GO:1902494 catalytic complex; GO:0044425 memb…	GO:0043169 cation binding; GO:0046872 metal ion binding; GO:0005509 calcium ion binding; GO:0005488 binding; GO:0043167 ion binding;				IPR016123;	Mog1/PsbP, alpha/beta/alpha sandwich;
A2YX12	kinectin	Up	OsI_29875	21.763	5.2	4	4	4	nucleus		GO:0044464 cell part; GO:0005622 intracellular; GO:0005737 cytoplasm; GO:0044424 intracellular part; GO:0005829 cytosol; GO:0005623 cell; GO:0044444 cytoplasmic part;	GO:0005515 protein binding; GO:0005488 binding;				IPR001943;	UVR domain;
A2YXP3	shikimate O-hydroxycinnamoyltransferase isoform X2	Down	OsI_30113	15.716	6.1	2	2	2	chloroplast			GO:0016746 transferase activity, transferring acyl groups; GO:0016747 transferase activity, transferring acyl groups other than amino-acyl groups; GO:0003824 catalytic activity; GO:0016740 transferase activity;				IPR023213;	Chloramphenicol acetyltransferase-like domain;
A2YXQ1	Transcription factor PCF2 OS=Oryza sativa subsp. indica OX=39946 GN=PCF2	Down	PCF2	3.9755	6.7	1	1	1	nucleus	GO:0050794 regulation of cellular process; GO:0044707 single-multicellular organism process; GO:0006725 cellular aromatic compound metabolic process; GO:0097659 nucleic acid-templated transcription; GO:0060255 regulation of macromolecule metabolic process; GO:0019219 regulation of nucleobase-containing compound metabolic process; GO:0044699 single-organism process; GO:0009058 biosynthetic process…	GO:0043226 organelle; GO:0043231 intracellular membrane-bounded organelle; GO:0043229 intracellular organelle; GO:0005634 nucleus; GO:0044464 cell part; GO:0005622 intracellular; GO:0044424 intracellular part; GO:0043227 membrane-bounded organelle; GO:0005623 cell;	GO:0097159 organic cyclic compound binding; GO:1901363 heterocyclic compound binding; GO:0003677 DNA binding; GO:0005488 binding; GO:0003676 nucleic acid binding;				IPR017887;	Transcription factor TCP subgroup;
A2YYQ4	UPF0548 protein At2g17695 isoform X2	Up	OsI_30473	3.9802	2.1	1	1	1	chloroplast	GO:0006508 proteolysis; GO:0008152 metabolic process; GO:0043170 macromolecule metabolic process; GO:0019538 protein metabolic process; GO:0044238 primary metabolic process; GO:0071704 organic substance metabolic process;		GO:0004252 serine-type endopeptidase activity; GO:0004175 endopeptidase activity; GO:0008233 peptidase activity; GO:0003824 catalytic activity; GO:0017171 serine hydrolase activity; GO:0008236 serine-type peptidase activity; GO:0070011 peptidase activity, acting on L-amino acid peptides; GO:0016787 hydrolase activity;				IPR000209; IPR018960;	Peptidase S8/S53 domain; Domain of unknown function DUF1990;
A2YZ71	Uncharacterized protein OS=Oryza sativa subsp. indica OX=39946 GN=OsI_30640	Up	OsI_30640	19.109	35.9	5	7	5	nucleus
A2Z0W7	Mannose-6-phosphate isomerase OS=Oryza sativa subsp. indica OX=39946 GN=OsI_31243	Up	OsI_31243	25.13	26.4	9	9	8	chloroplast	GO:0009226 nucleotide-sugar biosynthetic process; GO:0018130 heterocycle biosynthetic process; GO:0006725 cellular aromatic compound metabolic process; GO:0034654 nucleobase-containing compound biosynthetic process; GO:0006807 nitrogen compound metabolic process; GO:1901360 organic cyclic compound metabolic process; GO:0009058 biosynthetic process; GO:0044238 primary metabolic process; GO:0005975…		GO:0016853 isomerase activity; GO:0046914 transition metal ion binding; GO:0004476 mannose-6-phosphate isomerase activity; GO:0003824 catalytic activity; GO:0005488 binding; GO:0043167 ion binding; GO:0043169 cation binding; GO:0046872 metal ion binding; GO:0016860 intramolecular oxidoreductase activity; GO:0008270 zinc ion binding; GO:0016861 intramolecular oxidoreductase activity, interconverti…	K01809	manA, MPI; mannose-6-phosphate isomerase [EC:5.3.1.8]	osa00051 Fructose and mannose metabolism - Oryza sativa japonica (Japanese rice) (RefSeq); osa00520 Amino sugar and nucleotide sugar metabolism - Oryza sativa japonica (Japanese rice) (RefSeq); osa01100 Metabolic pathways - Oryza sativa japonica (Japanese rice) (RefSeq); osa01110 Biosynthesis of secondary metabolites - Oryza sativa japonica (Japanese rice) (RefSeq);	IPR011051; IPR014710;	RmlC-like cupin domain; RmlC-like jelly roll fold;
A2Z150	agenet domain-containing family protein [Populus trichocarpa]	Down	OsI_31322	64.471	18.1	11	12	4	nucleus			GO:0003682 chromatin binding; GO:0005488 binding;				IPR008395; IPR014002; IPR001025;	Agenet-like domain; Agenet domain, plant type; Bromo adjacent homology (BAH) domain;
A2Z210	heat stress transcription factor B-1	Down	OsI_31644	2.3293	4.2	1	2	1	nucleus	GO:0050794 regulation of cellular process; GO:0010468 regulation of gene expression; GO:0006355 regulation of transcription, DNA-templated; GO:0031326 regulation of cellular biosynthetic process; GO:0080090 regulation of primary metabolic process; GO:0060255 regulation of macromolecule metabolic process; GO:0019219 regulation of nucleobase-containing compound metabolic process; GO:0010556 regulat…	GO:0043226 organelle; GO:0043231 intracellular membrane-bounded organelle; GO:0043229 intracellular organelle; GO:0005634 nucleus; GO:0044464 cell part; GO:0005622 intracellular; GO:0044424 intracellular part; GO:0043227 membrane-bounded organelle; GO:0005623 cell;	GO:0097159 organic cyclic compound binding; GO:1901363 heterocyclic compound binding; GO:0003677 DNA binding; GO:0005488 binding; GO:0001071 nucleic acid binding transcription factor activity; GO:0003676 nucleic acid binding; GO:0043565 sequence-specific DNA binding; GO:0003700 transcription factor activity, sequence-specific DNA binding;	K09419	HSFF; heat shock transcription factor, other eukaryote		IPR000232;	Heat shock factor (HSF)-type, DNA-binding;
A2Z553	Uncharacterized protein OS=Oryza sativa subsp. indica OX=39946 GN=OsI_32780	Up	OsI_32780	52.803	62.4	4	8	4	cytoplasm
A2Z620	brain acid soluble protein 1 [Setaria italica]	Down	OsI_33098	11.142	25.5	3	3	3	nucleus
A2Z6F5	probable glutathione S-transferase GSTU6	Down	OsI_33235	7.299	40	3	3	3	cytoplasm				K00799	GST, gst; glutathione S-transferase [EC:2.5.1.18]	osa00480 Glutathione metabolism - Oryza sativa japonica (Japanese rice) (RefSeq);	IPR010987;	Glutathione S-transferase, C-terminal-like;
A2Z6H1	AP complex subunit sigma OS=Oryza sativa subsp. indica OX=39946 GN=OsI_33251	Down	OsI_33251	2.7454	14	2	2	1	chloroplast	GO:0045184 establishment of protein localization; GO:0006810 transport; GO:0071702 organic substance transport; GO:0051179 localization; GO:0033036 macromolecule localization; GO:0008104 protein localization; GO:0015031 protein transport; GO:0051234 establishment of localization;		GO:0022892 substrate-specific transporter activity; GO:0008565 protein transporter activity; GO:0005215 transporter activity;	K12403	AP4S1; AP-4 complex subunit sigma-1		IPR022775; IPR011012;	AP complex, mu/sigma subunit; Longin-like domain;
A2Z798	acylamino-acid-releasing enzyme isoform X1	Down	OsI_33574	10.946	3	2	2	1	nucleus	GO:0006508 proteolysis; GO:0008152 metabolic process; GO:0043170 macromolecule metabolic process; GO:0019538 protein metabolic process; GO:0044238 primary metabolic process; GO:0071704 organic substance metabolic process;		GO:0004252 serine-type endopeptidase activity; GO:0004175 endopeptidase activity; GO:0008233 peptidase activity; GO:0003824 catalytic activity; GO:0017171 serine hydrolase activity; GO:0008236 serine-type peptidase activity; GO:0070011 peptidase activity, acting on L-amino acid peptides; GO:0016787 hydrolase activity;	K01303	APEH; acylaminoacyl-peptidase [EC:3.4.19.1]		IPR001375; IPR029058;	Peptidase S9, prolyl oligopeptidase, catalytic domain; Alpha/Beta hydrolase fold;
A2Z7A7	chitinase 2	Down	OsI_33583	7.8628	8.3	2	2	2	cytoplasm	GO:0008152 metabolic process; GO:0005975 carbohydrate metabolic process; GO:0044238 primary metabolic process; GO:0071704 organic substance metabolic process;		GO:0004553 hydrolase activity, hydrolyzing O-glycosyl compounds; GO:0016787 hydrolase activity; GO:0003824 catalytic activity; GO:0016798 hydrolase activity, acting on glycosyl bonds;				IPR001223; IPR017853; IPR013781;	Glycoside hydrolase family 18, catalytic domain; Glycoside hydrolase superfamily; Glycoside hydrolase, catalytic domain;
A2Z901	AB hydrolase superfamily protein YfhM	Up	OsI_34193	2.1832	11.1	4	8	1	chloroplast			GO:0003824 catalytic activity;				IPR029058; IPR000073;	Alpha/Beta hydrolase fold; Alpha/beta hydrolase fold-1;
A2Z950	non-specific lipid-transfer protein 2P	Up	OsI_34241	9.5707	26.9	2	2	2	extracellular	GO:0006810 transport; GO:0006869 lipid transport; GO:1902578 single-organism localization; GO:0044699 single-organism process; GO:0010876 lipid localization; GO:0071702 organic substance transport; GO:0033036 macromolecule localization; GO:0051179 localization; GO:0044765 single-organism transport; GO:0051234 establishment of localization;						IPR016140; IPR033872;	Bifunctional inhibitor/plant lipid transfer protein/seed storage helical domain; Non-specific lipid-transfer protein type 2;
A2Z977	21 kDa protein	Down	OsI_34268	115.19	20.1	3	5	3	chloroplast	GO:0065009 regulation of molecular function; GO:0044092 negative regulation of molecular function; GO:0043086 negative regulation of catalytic activity; GO:0050790 regulation of catalytic activity; GO:0065007 biological regulation;		GO:0004857 enzyme inhibitor activity; GO:0098772 molecular function regulator; GO:0030234 enzyme regulator activity;				IPR006501;	Pectinesterase inhibitor domain;
A2Z9C3	protein CDI	Down	OsI_34319	41.203	45.2	10	16	10	mitochondria							IPR029044;	Nucleotide-diphospho-sugar transferases;
A2Z9K1	probable glutathione S-transferase GSTU6 [Aegilops tauschii subsp. tauschii]	Up	OsI_34411	1.6042	3.5	1	1	1	cytoplasm			GO:0005515 protein binding; GO:0005488 binding;	K00799	GST, gst; glutathione S-transferase [EC:2.5.1.18]	osa00480 Glutathione metabolism - Oryza sativa japonica (Japanese rice) (RefSeq);	IPR010987; IPR012336; IPR004045;	Glutathione S-transferase, C-terminal-like; Thioredoxin-like fold; Glutathione S-transferase, N-terminal;
A2Z9V6	chitinase 8	Up	OsI_34517	8.2799	9.6	2	2	2	chloroplast	GO:1901071 glucosamine-containing compound metabolic process; GO:0006030 chitin metabolic process; GO:0044036 cell wall macromolecule metabolic process; GO:0006026 aminoglycan catabolic process; GO:1901136 carbohydrate derivative catabolic process; GO:0006807 nitrogen compound metabolic process; GO:0006032 chitin catabolic process; GO:0005975 carbohydrate metabolic process; GO:0044238 primary met…		GO:0004553 hydrolase activity, hydrolyzing O-glycosyl compounds; GO:0016787 hydrolase activity; GO:0004568 chitinase activity; GO:0003824 catalytic activity; GO:0016798 hydrolase activity, acting on glycosyl bonds;	K20547	CHIB; basic endochitinase B [EC:3.2.1.14]	osa00520 Amino sugar and nucleotide sugar metabolism - Oryza sativa japonica (Japanese rice) (RefSeq); osa01100 Metabolic pathways - Oryza sativa japonica (Japanese rice) (RefSeq); osa04016 MAPK signaling pathway - plant - Oryza sativa japonica (Japanese rice) (RefSeq);	IPR023346; IPR000726;	Lysozyme-like domain; Glycoside hydrolase, family 19, catalytic;
A2ZCY2	probable carboxylesterase 18	Down	OsI_35645	3.849	7.1	2	2	2	nucleus	GO:0008152 metabolic process;		GO:0016787 hydrolase activity; GO:0003824 catalytic activity;				IPR029058; IPR013094;	Alpha/Beta hydrolase fold; Alpha/beta hydrolase fold-3;
A2ZEK7	omega-hydroxypalmitate O-feruloyl transferase	Up	OsI_36220	6.9662	11.4	3	4	1	nucleus			GO:0016746 transferase activity, transferring acyl groups; GO:0016747 transferase activity, transferring acyl groups other than amino-acyl groups; GO:0003824 catalytic activity; GO:0016740 transferase activity;	K15400	HHT1; omega-hydroxypalmitate O-feruloyl transferase [EC:2.3.1.188]	osa00073 Cutin, suberine and wax biosynthesis - Oryza sativa japonica (Japanese rice) (RefSeq);	IPR023213;	Chloramphenicol acetyltransferase-like domain;
A2ZF20	Xyloglucan endotransglucosylase/hydrolase OS=Oryza sativa subsp. indica OX=39946 GN=OsI_36383	Down	OsI_36383	3.385	5.8	2	2	2	extracellular	GO:0044085 cellular component biogenesis; GO:0016043 cellular component organization; GO:0006073 cellular glucan metabolic process; GO:0044036 cell wall macromolecule metabolic process; GO:0044042 glucan metabolic process; GO:0005975 carbohydrate metabolic process; GO:0044238 primary metabolic process; GO:0071555 cell wall organization; GO:0044237 cellular metabolic process; GO:0010410 hemicellul…	GO:0048046 apoplast; GO:0030312 external encapsulating structure; GO:0044464 cell part; GO:0071944 cell periphery; GO:0005618 cell wall; GO:0005623 cell; GO:0005576 extracellular region;	GO:0016762 xyloglucan:xyloglucosyl transferase activity; GO:0016758 transferase activity, transferring hexosyl groups; GO:0003824 catalytic activity; GO:0016798 hydrolase activity, acting on glycosyl bonds; GO:0004553 hydrolase activity, hydrolyzing O-glycosyl compounds; GO:0016757 transferase activity, transferring glycosyl groups; GO:0016787 hydrolase activity; GO:0016740 transferase activity;	K08235	E2.4.1.207; xyloglucan:xyloglucosyl transferase [EC:2.4.1.207]		IPR010713; IPR013320; IPR000757;	Xyloglucan endo-transglycosylase, C-terminal; Concanavalin A-like lectin/glucanase domain; Glycoside hydrolase family 16;
A2ZF63	transmembrane protein 87B	Down	OsI_36425	12.558	6.2	3	4	3	plasma membrane		GO:0043229 intracellular organelle; GO:0016020 membrane; GO:0005737 cytoplasm; GO:0031224 intrinsic component of membrane; GO:0012505 endomembrane system; GO:0044424 intracellular part; GO:0005623 cell; GO:0016021 integral component of membrane; GO:0043231 intracellular membrane-bounded organelle; GO:0043226 organelle; GO:0005622 intracellular; GO:0044464 cell part; GO:0044425 membrane part; GO:0…
A2ZF87	S-acyltransferase OS=Oryza sativa subsp. indica OX=39946 GN=OsI_36450	Down	OsI_36450	7.2083	4.2	2	2	2	plasma membrane		GO:0031224 intrinsic component of membrane; GO:0016020 membrane; GO:0016021 integral component of membrane; GO:0044425 membrane part;	GO:0016417 S-acyltransferase activity; GO:0016746 transferase activity, transferring acyl groups; GO:0003824 catalytic activity; GO:0019706 protein-cysteine S-palmitoyltransferase activity; GO:0005488 binding; GO:0019707 protein-cysteine S-acyltransferase activity; GO:0005515 protein binding; GO:0016409 palmitoyltransferase activity; GO:0016747 transferase activity, transferring acyl groups other…	K20032	ZDHHC13_17, HIP14; palmitoyltransferase ZDHHC13/17 [EC:2.3.1.225]		IPR001594; IPR020683;	Palmitoyltransferase, DHHC domain; Ankyrin repeat-containing domain;
A2ZG19	barwin	Down	OsI_36719	8.3433	6.8	1	1	1	chloroplast	GO:0050832 defense response to fungus; GO:0009605 response to external stimulus; GO:0009620 response to fungus; GO:0006950 response to stress; GO:0042742 defense response to bacterium; GO:0098542 defense response to other organism; GO:0006952 defense response; GO:0043207 response to external biotic stimulus; GO:0050896 response to stimulus; GO:0051707 response to other organism; GO:0009617 respon…						IPR009009; IPR001153;	RlpA-like protein, double-psi beta-barrel domain; Barwin domain;
A2ZJS7	serine hydroxymethyltransferase 4	Up	OsI_38072	43.402	36.1	11	24	3	cytoplasm	GO:0006725 cellular aromatic compound metabolic process; GO:0044699 single-organism process; GO:0006544 glycine metabolic process; GO:0035999 tetrahydrofolate interconversion; GO:0044237 cellular metabolic process; GO:0071704 organic substance metabolic process; GO:0008152 metabolic process; GO:0006520 cellular amino acid metabolic process; GO:0006575 cellular modified amino acid metabolic proces…		GO:0097159 organic cyclic compound binding; GO:1901363 heterocyclic compound binding; GO:0003824 catalytic activity; GO:0005488 binding; GO:0043167 ion binding; GO:0004372 glycine hydroxymethyltransferase activity; GO:0016741 transferase activity, transferring one-carbon groups; GO:0043168 anion binding; GO:0016742 hydroxymethyl-, formyl- and related transferase activity; GO:0048037 cofactor bind…	K00600	glyA, SHMT; glycine hydroxymethyltransferase [EC:2.1.2.1]	osa00260 Glycine, serine and threonine metabolism - Oryza sativa japonica (Japanese rice) (RefSeq); osa00460 Cyanoamino acid metabolism - Oryza sativa japonica (Japanese rice) (RefSeq); osa00630 Glyoxylate and dicarboxylate metabolism - Oryza sativa japonica (Japanese rice) (RefSeq); osa00670 One carbon pool by folate - Oryza sativa japonica (Japanese rice) (RefSeq); osa01100 Metabolic pathways -…	IPR015424; IPR015422; IPR015421;	Pyridoxal phosphate-dependent transferase; Pyridoxal phosphate-dependent transferase, major region, subdomain 2; Pyridoxal phosphate-dependent transferase, major region, subdomain 1;
A2ZKT4	myosin heavy chain, muscle [Nicotiana attenuata]	Up	OsI_38427	42.017	17.4	4	5	4	chloroplast
A2ZL88	60S ribosomal protein L37 [Zea mays]	Up	OsI_38590	8.8645	5.9	2	2	2	nucleus
A2ZLC0	putative stoned B-like protein	Up	OsI_38620	21.797	22	5	5	5	nucleus
A2ZLM3	GTP-binding protein SAR1A	Down	OsI_38721	30.602	60.1	11	25	1	cytoplasm	GO:0045184 establishment of protein localization; GO:0006810 transport; GO:0046907 intracellular transport; GO:0070727 cellular macromolecule localization; GO:0051649 establishment of localization in cell; GO:0016192 vesicle-mediated transport; GO:0006886 intracellular protein transport; GO:0071702 organic substance transport; GO:0008104 protein localization; GO:0033036 macromolecule localization…	GO:0043226 organelle; GO:0043231 intracellular membrane-bounded organelle; GO:0043229 intracellular organelle; GO:0005783 endoplasmic reticulum; GO:0044464 cell part; GO:0005622 intracellular; GO:0005737 cytoplasm; GO:0012505 endomembrane system; GO:0044424 intracellular part; GO:0005794 Golgi apparatus; GO:0043227 membrane-bounded organelle; GO:0005623 cell; GO:0044444 cytoplasmic part;	GO:1901265 nucleoside phosphate binding; GO:0001882 nucleoside binding; GO:0043167 ion binding; GO:0000166 nucleotide binding; GO:1901363 heterocyclic compound binding; GO:0097159 organic cyclic compound binding; GO:0032549 ribonucleoside binding; GO:0097367 carbohydrate derivative binding; GO:0032553 ribonucleotide binding; GO:0005488 binding; GO:0032550 purine ribonucleoside binding; GO:0043168…	K07953	SAR1; GTP-binding protein SAR1 [EC:3.6.5.-]	osa04141 Protein processing in endoplasmic reticulum - Oryza sativa japonica (Japanese rice) (RefSeq);	IPR005225; IPR027417;	Small GTP-binding protein domain; P-loop containing nucleoside triphosphate hydrolase;
B1B5Z0	"Starch synthase, chloroplastic/amyloplastic OS=Oryza sativa subsp. indica OX=39946 GN=Wx"	Down	Wx	323.31	55.2	27	88	26	chloroplast	GO:0005982 starch metabolic process; GO:0016051 carbohydrate biosynthetic process; GO:0006073 cellular glucan metabolic process; GO:0044711 single-organism biosynthetic process; GO:0000271 polysaccharide biosynthetic process; GO:0044042 glucan metabolic process; GO:0044763 single-organism cellular process; GO:0044699 single-organism process; GO:0033692 cellular polysaccharide biosynthetic process…	GO:0043226 organelle; GO:0043231 intracellular membrane-bounded organelle; GO:0043229 intracellular organelle; GO:0009501 amyloplast; GO:0044464 cell part; GO:0005622 intracellular; GO:0005737 cytoplasm; GO:0044424 intracellular part; GO:0005623 cell; GO:0043227 membrane-bounded organelle; GO:0009536 plastid; GO:0044444 cytoplasmic part; GO:0009507 chloroplast;	GO:1901265 nucleoside phosphate binding; GO:0019865 immunoglobulin binding; GO:0008194 UDP-glycosyltransferase activity; GO:0005515 protein binding; GO:0019863 IgE binding; GO:0097159 organic cyclic compound binding; GO:1901363 heterocyclic compound binding; GO:0003824 catalytic activity; GO:0032553 ribonucleotide binding; GO:0005488 binding; GO:0035251 UDP-glucosyltransferase activity; GO:003255…	K13679	WAXY; granule-bound starch synthase [EC:2.4.1.242]	osa00500 Starch and sucrose metabolism - Oryza sativa japonica (Japanese rice) (RefSeq); osa01100 Metabolic pathways - Oryza sativa japonica (Japanese rice) (RefSeq); osa01110 Biosynthesis of secondary metabolites - Oryza sativa japonica (Japanese rice) (RefSeq);	IPR013534; IPR001296;	Starch synthase, catalytic domain; Glycosyl transferase, family 1;
B8A6K4	Peroxidase OS=Oryza sativa subsp. indica OX=39946 GN=OsI_00829	Down	OsI_00829	34.485	26.5	7	9	6	chloroplast	GO:0006950 response to stress; GO:0055114 oxidation-reduction process; GO:0009636 response to toxic substance; GO:0044699 single-organism process; GO:0050896 response to stimulus; GO:0044237 cellular metabolic process; GO:0008152 metabolic process; GO:0042221 response to chemical; GO:1990748 cellular detoxification; GO:0042743 hydrogen peroxide metabolic process; GO:0072593 reactive oxygen specie…	GO:0005576 extracellular region;	GO:0097159 organic cyclic compound binding; GO:1901363 heterocyclic compound binding; GO:0020037 heme binding; GO:0003824 catalytic activity; GO:0005488 binding; GO:0043167 ion binding; GO:0016209 antioxidant activity; GO:0043169 cation binding; GO:0046872 metal ion binding; GO:0004601 peroxidase activity; GO:0046906 tetrapyrrole binding; GO:0016491 oxidoreductase activity; GO:0016684 oxidoreduct…	K00430	E1.11.1.7; peroxidase [EC:1.11.1.7]	osa00940 Phenylpropanoid biosynthesis - Oryza sativa japonica (Japanese rice) (RefSeq); osa01100 Metabolic pathways - Oryza sativa japonica (Japanese rice) (RefSeq); osa01110 Biosynthesis of secondary metabolites - Oryza sativa japonica (Japanese rice) (RefSeq);	IPR033905; IPR002016;	Secretory peroxidase; Haem peroxidase, plant/fungal/bacterial;
B8A8Y8	probable ribosome biogenesis protein RLP24	Up	OsI_02167	2.1796	16.5	3	3	1	cytoplasm				K02896	RP-L24e, RPL24; large subunit ribosomal protein L24e	osa03010 Ribosome - Oryza sativa japonica (Japanese rice) (RefSeq);	IPR011017;	TRASH domain;
B8A935	Uncharacterized protein OS=Oryza sativa subsp. indica OX=39946 GN=OsI_05144	Down	OsI_05144	137.05	41.9	19	34	17	cytoplasm		GO:0031224 intrinsic component of membrane; GO:0016020 membrane; GO:0016021 integral component of membrane; GO:0044425 membrane part;	GO:0005515 protein binding; GO:0005488 binding;				IPR020683;	Ankyrin repeat-containing domain;
B8A9C0	probable protein Pop3	Down	OsI_02178	8.4852	31.9	3	5	3	cytoplasm	GO:0050832 defense response to fungus; GO:0009605 response to external stimulus; GO:0009620 response to fungus; GO:0006950 response to stress; GO:0042742 defense response to bacterium; GO:0098542 defense response to other organism; GO:0006952 defense response; GO:0043207 response to external biotic stimulus; GO:0050896 response to stimulus; GO:0051707 response to other organism; GO:0009617 respon…	GO:0016020 membrane; GO:0071944 cell periphery; GO:0044464 cell part; GO:0005622 intracellular; GO:0005737 cytoplasm; GO:0044424 intracellular part; GO:0005829 cytosol; GO:0005623 cell; GO:0005886 plasma membrane; GO:0044444 cytoplasmic part;					IPR013097; IPR011008;	Stress responsive alpha-beta barrel; Dimeric alpha-beta barrel;
B8AAC7	PITH domain-containing protein 1	Down	OsI_02424	55.855	28.4	4	5	4	cytoplasm							IPR010400; IPR008979;	PITH domain; Galactose-binding domain-like;
B8AAK4	protein DJ-1 homolog B	Up	OsI_00908	1.6688	9.5	2	2	2	cytoplasm	GO:0036525 protein deglycation; GO:0008152 metabolic process; GO:0044260 cellular macromolecule metabolic process; GO:0044267 cellular protein metabolic process; GO:0006464 cellular protein modification process; GO:0030091 protein repair; GO:0043170 macromolecule metabolic process; GO:0019538 protein metabolic process; GO:0036211 protein modification process; GO:0044238 primary metabolic process;…		GO:0016829 lyase activity; GO:0016836 hydro-lyase activity; GO:0036524 protein deglycase activity; GO:0003824 catalytic activity; GO:0016835 carbon-oxygen lyase activity;				IPR029062; IPR002818;	Class I glutamine amidotransferase-like; DJ-1/PfpI;
B8ABP1	Coatomer subunit delta OS=Oryza sativa subsp. indica OX=39946 GN=OsI_04321	Down	OsI_04321	23.957	19.8	10	21	3	chloroplast	GO:0045184 establishment of protein localization; GO:0006810 transport; GO:0006890 retrograde vesicle-mediated transport, Golgi to ER; GO:0016192 vesicle-mediated transport; GO:0048193 Golgi vesicle transport; GO:0071702 organic substance transport; GO:0008104 protein localization; GO:0033036 macromolecule localization; GO:0051179 localization; GO:0015031 protein transport; GO:0051234 establishme…	GO:0016020 membrane; GO:0031410 cytoplasmic vesicle; GO:0031090 organelle membrane; GO:0098796 membrane protein complex; GO:0030137 COPI-coated vesicle; GO:0005737 cytoplasm; GO:0031982 vesicle; GO:0030660 Golgi-associated vesicle membrane; GO:0044433 cytoplasmic vesicle part; GO:0032991 macromolecular complex; GO:0044424 intracellular part; GO:0030120 vesicle coat; GO:0005623 cell; GO:0030663 CO…		K20471	COPD, ARCN1, RET2; coatomer subunit delta		IPR028565; IPR011012;	Mu homology domain; Longin-like domain;
B8AC72	translin-associated protein X	Down	OsI_01300	8.7865	11.4	3	3	3	chloroplast			GO:0097159 organic cyclic compound binding; GO:1901363 heterocyclic compound binding; GO:0003677 DNA binding; GO:0043565 sequence-specific DNA binding; GO:0005488 binding; GO:0003676 nucleic acid binding;				IPR016069; IPR016068;	Translin, C-terminal; Translin, N-terminal;
B8AC95	disease resistance protein RPM1-like	Down	OsI_01337	86.302	18	7	16	7	peroxisome	GO:0050794 regulation of cellular process; GO:0052548 regulation of endopeptidase activity; GO:0010951 negative regulation of endopeptidase activity; GO:0045861 negative regulation of proteolysis; GO:0080090 regulation of primary metabolic process; GO:0060255 regulation of macromolecule metabolic process; GO:0030162 regulation of proteolysis; GO:0031324 negative regulation of cellular metabolic p…		GO:1901265 nucleoside phosphate binding; GO:0061134 peptidase regulator activity; GO:0001882 nucleoside binding; GO:0043167 ion binding; GO:0000166 nucleotide binding; GO:0004857 enzyme inhibitor activity; GO:0098772 molecular function regulator; GO:0004866 endopeptidase inhibitor activity; GO:0004869 cysteine-type endopeptidase inhibitor activity; GO:0097159 organic cyclic compound binding; GO:1…				IPR002182; IPR000010; IPR027417;	NB-ARC; Cystatin domain; P-loop containing nucleoside triphosphate hydrolase;
B8AEB4	phosphopantothenate--cysteine ligase 1	Down	OsI_07771	35.455	29	8	9	8	cytoplasm				K01922	PPCS, COAB; phosphopantothenate---cysteine ligase (ATP) [EC:6.3.2.51]	osa00770 Pantothenate and CoA biosynthesis - Oryza sativa japonica (Japanese rice) (RefSeq); osa01100 Metabolic pathways - Oryza sativa japonica (Japanese rice) (RefSeq);	IPR007085;	DNA/pantothenate metabolism flavoprotein, C-terminal;
B8AEW6	Glycosyltransferase OS=Oryza sativa subsp. indica OX=39946 GN=OsI_06517	Up	OsI_06517	18.982	17.3	6	6	4	chloroplast	GO:0008152 metabolic process;		GO:0016757 transferase activity, transferring glycosyl groups; GO:0016758 transferase activity, transferring hexosyl groups; GO:0003824 catalytic activity; GO:0016740 transferase activity;	K08237	E2.4.1.218; hydroquinone glucosyltransferase [EC:2.4.1.218]
B8AFK9	probable inactive nicotinamidase At3g16190	Up	OsI_06736	6.7586	9.7	2	3	2	cytoskeleton	GO:0008152 metabolic process;		GO:0003824 catalytic activity;				IPR000868;	Isochorismatase-like;
B8AFS0	ADP-ribosylation factor GTPase-activating protein AGD2	Down	OsI_08174	41.193	8.5	5	5	5	cytoplasm	GO:0051336 regulation of hydrolase activity; GO:0043547 positive regulation of GTPase activity; GO:0051345 positive regulation of hydrolase activity; GO:0050790 regulation of catalytic activity; GO:0044093 positive regulation of molecular function; GO:0065009 regulation of molecular function; GO:0043087 regulation of GTPase activity; GO:0065007 biological regulation; GO:0043085 positive regulatio…	GO:0044424 intracellular part; GO:0005623 cell; GO:0044464 cell part; GO:0005622 intracellular; GO:0005737 cytoplasm;	GO:0030234 enzyme regulator activity; GO:0060589 nucleoside-triphosphatase regulator activity; GO:0005488 binding; GO:0030695 GTPase regulator activity; GO:0005515 protein binding; GO:0098772 molecular function regulator; GO:0008047 enzyme activator activity; GO:0005096 GTPase activator activity;	K12489	ACAP; Arf-GAP with coiled-coil, ANK repeat and PH domain-containing protein	osa04144 Endocytosis - Oryza sativa japonica (Japanese rice) (RefSeq);	IPR027267; IPR011993; IPR020683; IPR004148; IPR001849;	Arfaptin homology (AH) domain/BAR domain; PH domain-like; Ankyrin repeat-containing domain; BAR domain; Pleckstrin homology domain;
B8AFX5	zinc finger CCCH domain-containing protein 15	Up	OsI_06859	19.93	14.4	4	7	4	nucleus			GO:0046914 transition metal ion binding; GO:0005488 binding; GO:0043167 ion binding; GO:0043169 cation binding; GO:0046872 metal ion binding; GO:0005515 protein binding; GO:0008270 zinc ion binding;	K13127	RNF113A, CWC24; RING finger protein 113A		IPR000571; IPR001841; IPR013083;	Zinc finger, CCCH-type; Zinc finger, RING-type; Zinc finger, RING/FYVE/PHD-type;
B8AFY2	tyrosine aminotransferase isoform X2	Up	OsI_06871	9.1067	7.3	2	2	2	cytoplasm	GO:0044281 small molecule metabolic process; GO:0044763 single-organism cellular process; GO:0006807 nitrogen compound metabolic process; GO:0044699 single-organism process; GO:0009058 biosynthetic process; GO:0044238 primary metabolic process; GO:0044237 cellular metabolic process; GO:0071704 organic substance metabolic process; GO:0008152 metabolic process; GO:0006520 cellular amino acid metabo…		GO:0097159 organic cyclic compound binding; GO:1901363 heterocyclic compound binding; GO:0016769 transferase activity, transferring nitrogenous groups; GO:0003824 catalytic activity; GO:0005488 binding; GO:0043167 ion binding; GO:0043168 anion binding; GO:0008483 transaminase activity; GO:0016740 transferase activity; GO:0048037 cofactor binding; GO:0030170 pyridoxal phosphate binding;	K00815	TAT; tyrosine aminotransferase [EC:2.6.1.5]	osa00130 Ubiquinone and other terpenoid-quinone biosynthesis - Oryza sativa japonica (Japanese rice) (RefSeq); osa00270 Cysteine and methionine metabolism - Oryza sativa japonica (Japanese rice) (RefSeq); osa00350 Tyrosine metabolism - Oryza sativa japonica (Japanese rice) (RefSeq); osa00360 Phenylalanine metabolism - Oryza sativa japonica (Japanese rice) (RefSeq); osa00400 Phenylalanine, tyrosin…	IPR004839; IPR015424; IPR015421; IPR015422;	Aminotransferase, class I/classII; Pyridoxal phosphate-dependent transferase; Pyridoxal phosphate-dependent transferase, major region, subdomain 1; Pyridoxal phosphate-dependent transferase, major region, subdomain 2;
B8AG64	putative receptor-like protein kinase At4g00960 isoform X1 [Setaria italica]	Up	OsI_05511	-2	2.9	1	1	1	nucleus	GO:0016310 phosphorylation; GO:0044267 cellular protein metabolic process; GO:0044238 primary metabolic process; GO:0044237 cellular metabolic process; GO:0006796 phosphate-containing compound metabolic process; GO:0071704 organic substance metabolic process; GO:0008152 metabolic process; GO:0006468 protein phosphorylation; GO:0006793 phosphorus metabolic process; GO:0044260 cellular macromolecul…		GO:0005524 ATP binding; GO:1901265 nucleoside phosphate binding; GO:0016773 phosphotransferase activity, alcohol group as acceptor; GO:0001882 nucleoside binding; GO:0043167 ion binding; GO:0004672 protein kinase activity; GO:0000166 nucleotide binding; GO:0097159 organic cyclic compound binding; GO:1901363 heterocyclic compound binding; GO:0032549 ribonucleoside binding; GO:0097367 carbohydrate …				IPR000719; IPR001245; IPR011009;	Protein kinase domain; Serine-threonine/tyrosine-protein kinase catalytic domain; Protein kinase-like domain;
B8AGH7	Catalase OS=Oryza sativa subsp. indica OX=39946 GN=OsI_05576	Down	OsI_05576	160.54	48.8	19	56	17	cytoplasm	GO:0006950 response to stress; GO:0055114 oxidation-reduction process; GO:0009636 response to toxic substance; GO:0044699 single-organism process; GO:0050896 response to stimulus; GO:0044237 cellular metabolic process; GO:0008152 metabolic process; GO:0042221 response to chemical; GO:1990748 cellular detoxification; GO:0042743 hydrogen peroxide metabolic process; GO:0072593 reactive oxygen specie…		GO:0097159 organic cyclic compound binding; GO:1901363 heterocyclic compound binding; GO:0020037 heme binding; GO:0003824 catalytic activity; GO:0005488 binding; GO:0043167 ion binding; GO:0016209 antioxidant activity; GO:0043169 cation binding; GO:0046872 metal ion binding; GO:0004096 catalase activity; GO:0004601 peroxidase activity; GO:0046906 tetrapyrrole binding; GO:0016491 oxidoreductase ac…	K03781	katE, CAT, catB, srpA; catalase [EC:1.11.1.6]	osa00380 Tryptophan metabolism - Oryza sativa japonica (Japanese rice) (RefSeq); osa00630 Glyoxylate and dicarboxylate metabolism - Oryza sativa japonica (Japanese rice) (RefSeq); osa01110 Biosynthesis of secondary metabolites - Oryza sativa japonica (Japanese rice) (RefSeq); osa01200 Carbon metabolism - Oryza sativa japonica (Japanese rice) (RefSeq); osa04016 MAPK signaling pathway - plant - Ory…	IPR020835; IPR011614; IPR010582;	Catalase-like domain; Catalase core domain; Catalase immune-responsive domain;
B8AGU8	glycerate dehydrogenase	Down	OsI_05455	44.323	36.3	12	17	12	mitochondria	GO:0044699 single-organism process; GO:0008152 metabolic process; GO:0055114 oxidation-reduction process; GO:0044710 single-organism metabolic process;		GO:0097159 organic cyclic compound binding; GO:1901363 heterocyclic compound binding; GO:0016614 oxidoreductase activity, acting on CH-OH group of donors; GO:0016616 oxidoreductase activity, acting on the CH-OH group of donors, NAD or NADP as acceptor; GO:1901265 nucleoside phosphate binding; GO:0051287 NAD binding; GO:0003824 catalytic activity; GO:0005488 binding; GO:0000166 nucleotide binding;…	K15893	HPR1; hydroxypyruvate reductase 1	osa00260 Glycine, serine and threonine metabolism - Oryza sativa japonica (Japanese rice) (RefSeq); osa00630 Glyoxylate and dicarboxylate metabolism - Oryza sativa japonica (Japanese rice) (RefSeq); osa01100 Metabolic pathways - Oryza sativa japonica (Japanese rice) (RefSeq); osa01110 Biosynthesis of secondary metabolites - Oryza sativa japonica (Japanese rice) (RefSeq); osa01200 Carbon metabolis…	IPR006139; IPR006140; IPR016040;	D-isomer specific 2-hydroxyacid dehydrogenase, catalytic domain; D-isomer specific 2-hydroxyacid dehydrogenase, NAD-binding domain; NAD(P)-binding domain;
B8AH83	V-type proton ATPase subunit G OS=Oryza sativa subsp. indica OX=39946 GN=OsI_08596	Up	OsI_08596	17.119	43.6	5	12	2	chloroplast	GO:0006810 transport; GO:0055085 transmembrane transport; GO:1902578 single-organism localization; GO:0006812 cation transport; GO:0006811 ion transport; GO:0044699 single-organism process; GO:0051179 localization; GO:0015672 monovalent inorganic cation transport; GO:0006818 hydrogen transport; GO:0015992 proton transport; GO:0044765 single-organism transport; GO:0051234 establishment of localiza…	GO:0016020 membrane; GO:0043229 intracellular organelle; GO:0098588 bounding membrane of organelle; GO:0031090 organelle membrane; GO:0098796 membrane protein complex; GO:0005737 cytoplasm; GO:0044446 intracellular organelle part; GO:0032991 macromolecular complex; GO:0044424 intracellular part; GO:0033176 proton-transporting V-type ATPase complex; GO:0005623 cell; GO:0044422 organelle part; GO:0…	GO:0022804 active transmembrane transporter activity; GO:0003824 catalytic activity; GO:0016817 hydrolase activity, acting on acid anhydrides; GO:0016820 hydrolase activity, acting on acid anhydrides, catalyzing transmembrane movement of substances; GO:0016787 hydrolase activity; GO:0005215 transporter activity; GO:0022857 transmembrane transporter activity;	K02152	ATPeV1G, ATP6G; V-type H+-transporting ATPase subunit G	osa00190 Oxidative phosphorylation - Oryza sativa japonica (Japanese rice) (RefSeq); osa01100 Metabolic pathways - Oryza sativa japonica (Japanese rice) (RefSeq); osa04145 Phagosome - Oryza sativa japonica (Japanese rice) (RefSeq);
B8AH96	universal stress protein PHOS32 [Eucalyptus grandis]	Up	OsI_08621	15.173	28.2	4	4	4	cytoplasm	GO:0006950 response to stress; GO:0050896 response to stimulus;						IPR006016; IPR014729;	UspA; Rossmann-like alpha/beta/alpha sandwich fold;
B8AJ78	PTI1-like tyrosine-protein kinase At3g15890	Down	OsI_06147	11.203	9.5	3	4	3	cytoplasm	GO:0016310 phosphorylation; GO:0044267 cellular protein metabolic process; GO:0044238 primary metabolic process; GO:0044237 cellular metabolic process; GO:0006796 phosphate-containing compound metabolic process; GO:0071704 organic substance metabolic process; GO:0008152 metabolic process; GO:0006468 protein phosphorylation; GO:0006793 phosphorus metabolic process; GO:0044260 cellular macromolecul…		GO:0005524 ATP binding; GO:1901265 nucleoside phosphate binding; GO:0016773 phosphotransferase activity, alcohol group as acceptor; GO:0001882 nucleoside binding; GO:0043167 ion binding; GO:0004672 protein kinase activity; GO:0000166 nucleotide binding; GO:0097159 organic cyclic compound binding; GO:1901363 heterocyclic compound binding; GO:0032549 ribonucleoside binding; GO:0097367 carbohydrate …				IPR000719; IPR001245; IPR011009;	Protein kinase domain; Serine-threonine/tyrosine-protein kinase catalytic domain; Protein kinase-like domain;
B8AJA5	ent-isokaurene C2-hydroxylase-like	Up	OsI_06139	12.84	10.9	6	6	4	chloroplast	GO:0044699 single-organism process; GO:0008152 metabolic process; GO:0055114 oxidation-reduction process; GO:0044710 single-organism metabolic process;		GO:0097159 organic cyclic compound binding; GO:1901363 heterocyclic compound binding; GO:0020037 heme binding; GO:0005506 iron ion binding; GO:0046914 transition metal ion binding; GO:0003824 catalytic activity; GO:0005488 binding; GO:0043167 ion binding; GO:0016705 oxidoreductase activity, acting on paired donors, with incorporation or reduction of molecular oxygen; GO:0043169 cation binding; GO…
B8AJC8	transcription factor bHLH95-like	Up	OsI_07597	66.908	30.7	6	12	6	nucleus	GO:0008152 metabolic process;		GO:0016597 amino acid binding; GO:0031406 carboxylic acid binding; GO:0005488 binding; GO:0046983 protein dimerization activity; GO:0043167 ion binding; GO:0043177 organic acid binding; GO:0005515 protein binding; GO:0043168 anion binding; GO:0036094 small molecule binding;				IPR002912; IPR011598;	ACT domain; Myc-type, basic helix-loop-helix (bHLH) domain;
B8ALF3	40S ribosomal protein S17-3	Down	OsI_09682	23.449	28	7	17	5	chloroplast	GO:0006518 peptide metabolic process; GO:0043043 peptide biosynthetic process; GO:0044267 cellular protein metabolic process; GO:0006807 nitrogen compound metabolic process; GO:0009058 biosynthetic process; GO:0043603 cellular amide metabolic process; GO:0044238 primary metabolic process; GO:1901566 organonitrogen compound biosynthetic process; GO:1901576 organic substance biosynthetic process; G…	GO:0005840 ribosome; GO:0043226 organelle; GO:0043229 intracellular organelle; GO:0043232 intracellular non-membrane-bounded organelle; GO:0044464 cell part; GO:0005622 intracellular; GO:0005737 cytoplasm; GO:0032991 macromolecular complex; GO:0044424 intracellular part; GO:1990904 ribonucleoprotein complex; GO:0005623 cell; GO:0030529 intracellular ribonucleoprotein complex; GO:0044444 cytoplasm…	GO:0003735 structural constituent of ribosome; GO:0005198 structural molecule activity;	K02962	RP-S17e, RPS17; small subunit ribosomal protein S17e	osa03010 Ribosome - Oryza sativa japonica (Japanese rice) (RefSeq);
B8ALG5	Uncharacterized protein OS=Oryza sativa subsp. indica OX=39946 GN=OsI_09641	Up	OsI_09641	9.9998	6.7	4	5	4	endoplasmic reticulum
B8ALL6	nitric oxide synthase-interacting protein	Down	OsI_11023	12.918	17.7	4	5	4	cytoplasm	GO:0044707 single-multicellular organism process; GO:0065008 regulation of biological quality; GO:0009628 response to abiotic stimulus; GO:0044267 cellular protein metabolic process; GO:0044699 single-organism process; GO:0009791 post-embryonic development; GO:0050896 response to stimulus; GO:0044237 cellular metabolic process; GO:0071704 organic substance metabolic process; GO:0008152 metabolic …	GO:0043229 intracellular organelle; GO:0005737 cytoplasm; GO:0044446 intracellular organelle part; GO:0031981 nuclear lumen; GO:0044424 intracellular part; GO:0016604 nuclear body; GO:0005623 cell; GO:0044422 organelle part; GO:0043231 intracellular membrane-bounded organelle; GO:0043226 organelle; GO:0031974 membrane-enclosed lumen; GO:0005634 nucleus; GO:0005654 nucleoplasm; GO:0070013 intracel…	GO:0061630 ubiquitin protein ligase activity; GO:0046914 transition metal ion binding; GO:0019787 ubiquitin-like protein transferase activity; GO:0003824 catalytic activity; GO:0005488 binding; GO:0043167 ion binding; GO:0004842 ubiquitin-protein transferase activity; GO:0043169 cation binding; GO:0046872 metal ion binding; GO:0005515 protein binding; GO:0061659 ubiquitin-like protein ligase acti…	K13125	NOSIP; nitric oxide synthase-interacting protein		IPR001841; IPR013083; IPR031790; IPR027799;	Zinc finger, RING-type; Zinc finger, RING/FYVE/PHD-type; Nitric oxide synthase-interacting protein, zinc-finger; Replication termination factor 2, RING-finger;
B8AM79	serpin-ZXB	Down	OsI_12594	17.566	36.8	4	8	3	cytoplasm		GO:0005615 extracellular space; GO:0044421 extracellular region part; GO:0005576 extracellular region;		K13963	SERPINB; serpin B		IPR023796;	Serpin domain;
B8AN97	nicotinate phosphoribosyltransferase 1	Down	OsI_14231	74.211	22.3	10	12	9	chloroplast	GO:0051188 cofactor biosynthetic process; GO:0043173 nucleotide salvage; GO:0009165 nucleotide biosynthetic process; GO:0019362 pyridine nucleotide metabolic process; GO:0006725 cellular aromatic compound metabolic process; GO:0046496 nicotinamide nucleotide metabolic process; GO:0009117 nucleotide metabolic process; GO:0044699 single-organism process; GO:0009058 biosynthetic process; GO:0019363 …		GO:0016763 transferase activity, transferring pentosyl groups; GO:0004516 nicotinate phosphoribosyltransferase activity; GO:0016757 transferase activity, transferring glycosyl groups; GO:0004514 nicotinate-nucleotide diphosphorylase (carboxylating) activity; GO:0003824 catalytic activity; GO:0016740 transferase activity;	K00763	pncB, NAPRT1; nicotinate phosphoribosyltransferase [EC:6.3.4.21]	osa00760 Nicotinate and nicotinamide metabolism - Oryza sativa japonica (Japanese rice) (RefSeq); osa01100 Metabolic pathways - Oryza sativa japonica (Japanese rice) (RefSeq);	IPR002638;	Quinolinate phosphoribosyl transferase, C-terminal;
B8ANR7	ATP-dependent DNA helicase 2 subunit KU80 OS=Oryza sativa subsp. indica OX=39946 GN=OsI_14396	Down	OsI_14396	7.5426	3.1	2	2	2	cytoplasm	GO:0033554 cellular response to stress; GO:0016043 cellular component organization; GO:0065008 regulation of biological quality; GO:0006725 cellular aromatic compound metabolic process; GO:0009628 response to abiotic stimulus; GO:0006259 DNA metabolic process; GO:0006302 double-strand break repair; GO:0032392 DNA geometric change; GO:0050896 response to stimulus; GO:0044237 cellular metabolic pro…	GO:0043564 Ku70:Ku80 complex; GO:0043226 organelle; GO:0043229 intracellular organelle; GO:0043231 intracellular membrane-bounded organelle; GO:0005634 nucleus; GO:0044464 cell part; GO:0005622 intracellular; GO:0044446 intracellular organelle part; GO:0032991 macromolecular complex; GO:0044424 intracellular part; GO:0043234 protein complex; GO:0005623 cell; GO:0043227 membrane-bounded organelle;…	GO:1901265 nucleoside phosphate binding; GO:0003690 double-stranded DNA binding; GO:0008026 ATP-dependent helicase activity; GO:0042162 telomeric DNA binding; GO:0016817 hydrolase activity, acting on acid anhydrides; GO:0016787 hydrolase activity; GO:0016887 ATPase activity; GO:1901363 heterocyclic compound binding; GO:0097159 organic cyclic compound binding; GO:0016462 pyrophosphatase activity; …	K10885	XRCC5, KU80, G22P2; ATP-dependent DNA helicase 2 subunit 2	osa03450 Non-homologous end-joining - Oryza sativa japonica (Japanese rice) (RefSeq);	IPR005161; IPR006164; IPR016194; IPR005160; IPR014893; IPR002035;	Ku70/Ku80, N-terminal alpha/beta; Ku70/Ku80 beta-barrel domain; SPOC-like, C-terminal domain; Ku70/Ku80 C-terminal arm; Ku, C-terminal; von Willebrand factor, type A;
B8APP6	Plasma membrane ATPase OS=Oryza sativa subsp. indica OX=39946 GN=OsI_10283	Up	OsI_10283	3.8566	8.4	6	15	2	plasma membrane	GO:0009116 nucleoside metabolic process; GO:0065008 regulation of biological quality; GO:0022414 reproductive process; GO:0030641 regulation of cellular pH; GO:0030004 cellular monovalent inorganic cation homeostasis; GO:0009163 nucleoside biosynthetic process; GO:0046129 purine ribonucleoside biosynthetic process; GO:0044237 cellular metabolic process; GO:0046390 ribose phosphate biosynthetic pr…	GO:0043229 intracellular organelle; GO:0016020 membrane; GO:0098588 bounding membrane of organelle; GO:0031090 organelle membrane; GO:0030054 cell junction; GO:0005737 cytoplasm; GO:0044446 intracellular organelle part; GO:0031224 intrinsic component of membrane; GO:0009705 plant-type vacuole membrane; GO:0044424 intracellular part; GO:0005911 cell-cell junction; GO:0005623 cell; GO:0055044 sympl…	GO:0042625 ATPase coupled ion transmembrane transporter activity; GO:1901265 nucleoside phosphate binding; GO:0015399 primary active transmembrane transporter activity; GO:0022892 substrate-specific transporter activity; GO:0016817 hydrolase activity, acting on acid anhydrides; GO:0015077 monovalent inorganic cation transmembrane transporter activity; GO:0016787 hydrolase activity; GO:0015078 hyd…	K01535	PMA1, PMA2; H+-transporting ATPase [EC:3.6.3.6]	osa00190 Oxidative phosphorylation - Oryza sativa japonica (Japanese rice) (RefSeq);	IPR004014; IPR023298; IPR008250; IPR023299; IPR023214;	Cation-transporting P-type ATPase, N-terminal; P-type ATPase, transmembrane domain; P-type ATPase, A domain; P-type ATPase, cytoplasmic domain N; HAD-like domain;
B8APZ1	Chloride channel protein OS=Oryza sativa subsp. indica OX=39946 GN=OsI_13133	Down	OsI_13133	6.1148	3.8	3	3	3	plasma membrane	GO:0016043 cellular component organization; GO:0034220 ion transmembrane transport; GO:0044070 regulation of anion transport; GO:0048869 cellular developmental process; GO:0032989 cellular component morphogenesis; GO:0044699 single-organism process; GO:0006821 chloride transport; GO:0051234 establishment of localization; GO:0009653 anatomical structure morphogenesis; GO:0032879 regulation of loca…	GO:0043229 intracellular organelle; GO:0016020 membrane; GO:0044446 intracellular organelle part; GO:0005737 cytoplasm; GO:0031224 intrinsic component of membrane; GO:0012505 endomembrane system; GO:0044424 intracellular part; GO:0005623 cell; GO:0016021 integral component of membrane; GO:0044422 organelle part; GO:0043231 intracellular membrane-bounded organelle; GO:0043226 organelle; GO:0044425…	GO:0015075 ion transmembrane transporter activity; GO:0022803 passive transmembrane transporter activity; GO:0005253 anion channel activity; GO:0022892 substrate-specific transporter activity; GO:0005254 chloride channel activity; GO:0015103 inorganic anion transmembrane transporter activity; GO:0015267 channel activity; GO:0022891 substrate-specific transmembrane transporter activity; GO:0015108…	K05016	CLCN7; chloride channel 7		IPR014743; IPR000644;	Chloride channel, core; CBS domain;
B8AQW6	Carboxypeptidase OS=Oryza sativa subsp. indica OX=39946 GN=OsI_11895	Down	OsI_11895	9.5054	4.3	1	1	1	extracellular	GO:0006508 proteolysis; GO:0008152 metabolic process; GO:0043170 macromolecule metabolic process; GO:0019538 protein metabolic process; GO:0044238 primary metabolic process; GO:0071704 organic substance metabolic process;		GO:0004180 carboxypeptidase activity; GO:0008233 peptidase activity; GO:0008238 exopeptidase activity; GO:0017171 serine hydrolase activity; GO:0003824 catalytic activity; GO:0008236 serine-type peptidase activity; GO:0070011 peptidase activity, acting on L-amino acid peptides; GO:0004185 serine-type carboxypeptidase activity; GO:0016787 hydrolase activity; GO:0070008 serine-type exopeptidase act…	K09646	SCPEP1; serine carboxypeptidase 1 [EC:3.4.16.-]		IPR029058;	Alpha/Beta hydrolase fold;
B8ARF5	probable acyl-activating enzyme 6	Down	OsI_17900	31.098	16.1	6	8	6	extracellular	GO:0008152 metabolic process;		GO:0003824 catalytic activity;				IPR025110; IPR000873;	AMP-binding enzyme C-terminal domain; AMP-dependent synthetase/ligase;
B8ASG9	dCTP pyrophosphatase 1	Down	OsI_15429	26.375	24.9	3	4	2	mitochondria			GO:0047429 nucleoside-triphosphate diphosphatase activity; GO:0016817 hydrolase activity, acting on acid anhydrides; GO:0016787 hydrolase activity; GO:0016462 pyrophosphatase activity; GO:0016818 hydrolase activity, acting on acid anhydrides, in phosphorus-containing anhydrides; GO:0003824 catalytic activity;	K16904	DCTPP1; dCTP diphosphatase [EC:3.6.1.12]	osa00240 Pyrimidine metabolism - Oryza sativa japonica (Japanese rice) (RefSeq); osa01100 Metabolic pathways - Oryza sativa japonica (Japanese rice) (RefSeq);
B8AT89	LOW QUALITY PROTEIN: 4-sulfomuconolactone hydrolase	Down	OsI_15682	20.279	21.3	8	10	8	cytoplasm		GO:0043226 organelle; GO:0043231 intracellular membrane-bounded organelle; GO:0043229 intracellular organelle; GO:0044464 cell part; GO:0005622 intracellular; GO:0005737 cytoplasm; GO:0044424 intracellular part; GO:0043227 membrane-bounded organelle; GO:0005623 cell; GO:0009536 plastid; GO:0044444 cytoplasmic part; GO:0009507 chloroplast;	GO:0016787 hydrolase activity; GO:0003824 catalytic activity;				IPR032466; IPR006680;	Metal-dependent hydrolase; Amidohydrolase-related;
B8ATA5	E3 ubiquitin ligase BIG BROTHER-related-like isoform X1	Up	OsI_15705	4.3928	5.9	2	2	2	nucleus
B8ATZ7	acetyltransferase At1g77540 [Brachypodium distachyon]	Down	OsI_15941	12.669	29.1	5	5	3	nucleus							IPR031165; IPR016181;	Yjdj-type Gcn5-related N-acetyltransferase; Acyl-CoA N-acyltransferase;
B8AU79	zinc finger CCCH domain-containing protein 24	Down	OsI_14559	12.555	8.7	5	8	5	nucleus	GO:0006396 RNA processing; GO:0006725 cellular aromatic compound metabolic process; GO:1901360 organic cyclic compound metabolic process; GO:0006807 nitrogen compound metabolic process; GO:0044238 primary metabolic process; GO:0009451 RNA modification; GO:0044237 cellular metabolic process; GO:0032259 methylation; GO:0071704 organic substance metabolic process; GO:0016070 RNA metabolic process; G…		GO:1901265 nucleoside phosphate binding; GO:0008168 methyltransferase activity; GO:0043167 ion binding; GO:0016741 transferase activity, transferring one-carbon groups; GO:0000166 nucleotide binding; GO:1901363 heterocyclic compound binding; GO:0097159 organic cyclic compound binding; GO:0008173 RNA methyltransferase activity; GO:0003824 catalytic activity; GO:0005488 binding; GO:0003676 nucleic …	K15332	TRMT2A; tRNA (uracil-5-)-methyltransferase [EC:2.1.1.-]		IPR000571; IPR025714; IPR000504; IPR029063; IPR012677;	Zinc finger, CCCH-type; Methyltransferase domain; RNA recognition motif domain; S-adenosyl-L-methionine-dependent methyltransferase; Nucleotide-binding alpha-beta plait domain;
B8AVF1	beta-glucosidase 13	Up	OsI_16289	16.792	7.8	5	6	5	endoplasmic reticulum	GO:0008152 metabolic process; GO:0005975 carbohydrate metabolic process; GO:0044238 primary metabolic process; GO:0071704 organic substance metabolic process;		GO:0004553 hydrolase activity, hydrolyzing O-glycosyl compounds; GO:0016787 hydrolase activity; GO:0003824 catalytic activity; GO:0016798 hydrolase activity, acting on glycosyl bonds;	K01188	E3.2.1.21; beta-glucosidase [EC:3.2.1.21]	osa00460 Cyanoamino acid metabolism - Oryza sativa japonica (Japanese rice) (RefSeq); osa00500 Starch and sucrose metabolism - Oryza sativa japonica (Japanese rice) (RefSeq); osa00940 Phenylpropanoid biosynthesis - Oryza sativa japonica (Japanese rice) (RefSeq); osa01100 Metabolic pathways - Oryza sativa japonica (Japanese rice) (RefSeq); osa01110 Biosynthesis of secondary metabolites - Oryza sat…	IPR017853; IPR013781;	Glycoside hydrolase superfamily; Glycoside hydrolase, catalytic domain;
B8AVH9	endoglucanase	Up	OsI_16343	6.1603	3.2	2	2	2	chloroplast	GO:0008152 metabolic process; GO:0005975 carbohydrate metabolic process; GO:0044238 primary metabolic process; GO:0071704 organic substance metabolic process;		GO:0004553 hydrolase activity, hydrolyzing O-glycosyl compounds; GO:0016787 hydrolase activity; GO:0003824 catalytic activity; GO:0016798 hydrolase activity, acting on glycosyl bonds;				IPR000772; IPR001547; IPR017853; IPR013781;	Ricin B, lectin domain; Glycoside hydrolase, family 5; Glycoside hydrolase superfamily; Glycoside hydrolase, catalytic domain;
B8AVY1	naringenin,2-oxoglutarate 3-dioxygenase	Up	OsI_17790	48.939	28.4	8	12	8	chloroplast	GO:0044699 single-organism process; GO:0008152 metabolic process; GO:0055114 oxidation-reduction process; GO:0044710 single-organism metabolic process;		GO:0046872 metal ion binding; GO:0043169 cation binding; GO:0003824 catalytic activity; GO:0005488 binding; GO:0016491 oxidoreductase activity; GO:0043167 ion binding;	K00475	E1.14.11.9; naringenin 3-dioxygenase [EC:1.14.11.9]	osa00941 Flavonoid biosynthesis - Oryza sativa japonica (Japanese rice) (RefSeq); osa01100 Metabolic pathways - Oryza sativa japonica (Japanese rice) (RefSeq); osa01110 Biosynthesis of secondary metabolites - Oryza sativa japonica (Japanese rice) (RefSeq);	IPR005123; IPR027443; IPR026992;	Oxoglutarate/iron-dependent dioxygenase; Isopenicillin N synthase-like; Non-haem dioxygenase N-terminal domain;
B8AWM4	Superoxide dismutase OS=Oryza sativa subsp. indica OX=39946 GN=OsI_19472	Up	OsI_19472	50.482	27.3	5	13	5	mitochondria	GO:0006801 superoxide metabolic process; GO:0033554 cellular response to stress; GO:0051716 cellular response to stimulus; GO:0000303 response to superoxide; GO:0034614 cellular response to reactive oxygen species; GO:0006950 response to stress; GO:0071451 cellular response to superoxide; GO:0071450 cellular response to oxygen radical; GO:0055114 oxidation-reduction process; GO:0009636 response t…		GO:0004784 superoxide dismutase activity; GO:0003824 catalytic activity; GO:0016721 oxidoreductase activity, acting on superoxide radicals as acceptor; GO:0005488 binding; GO:0043167 ion binding; GO:0016209 antioxidant activity; GO:0043169 cation binding; GO:0046872 metal ion binding; GO:0016491 oxidoreductase activity;	K04564	SOD2; superoxide dismutase, Fe-Mn family [EC:1.15.1.1]	osa04146 Peroxisome - Oryza sativa japonica (Japanese rice) (RefSeq);	IPR019831; IPR019832;	Manganese/iron superoxide dismutase, N-terminal; Manganese/iron superoxide dismutase, C-terminal;
B8AXD9	S-adenosylmethionine carrier 1, chloroplastic/mitochondrial	Up	OsI_19641	3.7168	5.6	2	3	2	cytoplasm	GO:0006810 transport; GO:0055085 transmembrane transport; GO:0051179 localization; GO:0051234 establishment of localization;	GO:0031224 intrinsic component of membrane; GO:0016020 membrane; GO:0016021 integral component of membrane; GO:0044425 membrane part;		K15111	SLC25A26; solute carrier family 25 (mitochondrial S-adenosylmethionine transporter), member 26		IPR023395;	Mitochondrial carrier domain;
B8AXM9	Uncharacterized protein OS=Oryza sativa subsp. indica OX=39946 GN=OsI_18267	Down	OsI_18267	10.961	9.9	6	9	4	nucleus			GO:0005515 protein binding; GO:0005488 binding;				IPR020683;	Ankyrin repeat-containing domain;
B8AYB5	pheophytinase, chloroplastic	Up	OsI_19994	3.931	25.6	1	1	1	chloroplast							IPR029058;	Alpha/Beta hydrolase fold;
B8AYY6	hypoxanthine-guanine phosphoribosyltransferase-like	Down	OsI_18723	12.566	30.3	4	4	4	cytoplasm	GO:0009116 nucleoside metabolic process; GO:0006725 cellular aromatic compound metabolic process; GO:0044281 small molecule metabolic process; GO:0044763 single-organism cellular process; GO:0044699 single-organism process; GO:1901360 organic cyclic compound metabolic process; GO:0006807 nitrogen compound metabolic process; GO:0044238 primary metabolic process; GO:0044237 cellular metabolic proce…			K00760	hprT, hpt, HPRT1; hypoxanthine phosphoribosyltransferase [EC:2.4.2.8]	osa00230 Purine metabolism - Oryza sativa japonica (Japanese rice) (RefSeq); osa01100 Metabolic pathways - Oryza sativa japonica (Japanese rice) (RefSeq); osa01110 Biosynthesis of secondary metabolites - Oryza sativa japonica (Japanese rice) (RefSeq);	IPR000836; IPR029057;	Phosphoribosyltransferase domain; Phosphoribosyltransferase-like;
B8AZE9	Glutathione synthetase OS=Oryza sativa subsp. indica OX=39946 GN=OsI_18978	Up	OsI_18978	4.4191	3.7	2	3	1	chloroplast	GO:0006790 sulfur compound metabolic process; GO:0006518 peptide metabolic process; GO:0043043 peptide biosynthetic process; GO:0042398 cellular modified amino acid biosynthetic process; GO:0006807 nitrogen compound metabolic process; GO:0009058 biosynthetic process; GO:0043603 cellular amide metabolic process; GO:1901566 organonitrogen compound biosynthetic process; GO:1901576 organic substance …		GO:1901265 nucleoside phosphate binding; GO:0004363 glutathione synthase activity; GO:0046983 protein dimerization activity; GO:0016874 ligase activity; GO:0005515 protein binding; GO:0043295 glutathione binding; GO:1900750 oligopeptide binding; GO:0097159 organic cyclic compound binding; GO:1901363 heterocyclic compound binding; GO:0042802 identical protein binding; GO:0042277 peptide binding; G…				IPR016185; IPR014709; IPR014049; IPR014042; IPR004887;	Pre-ATP-grasp domain; Glutathione synthase domain; Glutathione synthase, N-terminal, eukaryotic; Glutathione synthase, alpha-helical, eukaryotic; Glutathione synthase, substrate-binding, eukaryotic;
B8B0P1	elongator complex protein 4	Down	OsI_23846	12.403	12.2	4	4	4	nucleus		GO:0044464 cell part; GO:0005622 intracellular; GO:0032991 macromolecular complex; GO:0044424 intracellular part; GO:0043234 protein complex; GO:0005623 cell; GO:0033588 Elongator holoenzyme complex;		K11375	ELP4; elongator complex protein 4		IPR027417;	P-loop containing nucleoside triphosphate hydrolase;
B8B0T2	anthocyanidin reductase isoform X1	Up	OsI_23929	49.154	27.5	9	13	9	cytoplasm			GO:0048037 cofactor binding; GO:0003824 catalytic activity; GO:0005488 binding; GO:0050662 coenzyme binding;				IPR001509; IPR016040;	NAD-dependent epimerase/dehydratase; NAD(P)-binding domain;
B8B294	putative transferase At4g12130, mitochondrial	Up	OsI_21522	36.756	25.9	9	10	9	chloroplast	GO:0006790 sulfur compound metabolic process; GO:0044085 cellular component biogenesis; GO:0051188 cofactor biosynthetic process; GO:0016043 cellular component organization; GO:0008152 metabolic process; GO:0031163 metallo-sulfur cluster assembly; GO:0022607 cellular component assembly; GO:0016226 iron-sulfur cluster assembly; GO:0009058 biosynthetic process; GO:0009987 cellular process; GO:00442…	GO:0005759 mitochondrial matrix; GO:0043229 intracellular organelle; GO:0044429 mitochondrial part; GO:0005737 cytoplasm; GO:0044446 intracellular organelle part; GO:0044424 intracellular part; GO:0005623 cell; GO:0005739 mitochondrion; GO:0044422 organelle part; GO:0031974 membrane-enclosed lumen; GO:0043226 organelle; GO:0043231 intracellular membrane-bounded organelle; GO:0070013 intracellular…		K22073	IBA57; transferase CAF17, mitochondrial [EC:2.1.-.-]		IPR013977;	Glycine cleavage T-protein, C-terminal barrel domain;
B8B2J2	Uncharacterized protein OS=Oryza sativa subsp. indica OX=39946 GN=OsI_24491	Up	OsI_24491	137.49	29.9	12	21	10	chloroplast							IPR011676;	Domain of unknown function DUF1618;
B8B2Y6	"Ubiquinone biosynthesis O-methyltransferase, mitochondrial OS=Oryza sativa subsp. indica OX=39946 GN=COQ3"	Up	COQ3	15.609	11.9	3	4	3	chloroplast	GO:0051188 cofactor biosynthetic process; GO:0042181 ketone biosynthetic process; GO:1901663 quinone biosynthetic process; GO:0006744 ubiquinone biosynthetic process; GO:0006733 oxidoreduction coenzyme metabolic process; GO:0044711 single-organism biosynthetic process; GO:1901661 quinone metabolic process; GO:0044281 small molecule metabolic process; GO:0044763 single-organism cellular process; G…	GO:0043229 intracellular organelle; GO:0016020 membrane; GO:0044429 mitochondrial part; GO:0031314 extrinsic component of mitochondrial inner membrane; GO:0019898 extrinsic component of membrane; GO:0031090 organelle membrane; GO:0044446 intracellular organelle part; GO:0005737 cytoplasm; GO:0031967 organelle envelope; GO:0044424 intracellular part; GO:0005623 cell; GO:0044455 mitochondrial membr…	GO:0010420 polyprenyldihydroxybenzoate methyltransferase activity; GO:0008757 S-adenosylmethionine-dependent methyltransferase activity; GO:0004395 hexaprenyldihydroxybenzoate methyltransferase activity; GO:0008168 methyltransferase activity; GO:0008689 3-demethylubiquinone-9 3-O-methyltransferase activity; GO:0003824 catalytic activity; GO:0061542 3-demethylubiquinone-n 3-O-methyltransferase act…	K00591	COQ3; polyprenyldihydroxybenzoate methyltransferase / 3-demethylubiquinol 3-O-methyltransferase [EC:2.1.1.114 2.1.1.64]	osa00130 Ubiquinone and other terpenoid-quinone biosynthesis - Oryza sativa japonica (Japanese rice) (RefSeq); osa01100 Metabolic pathways - Oryza sativa japonica (Japanese rice) (RefSeq); osa01110 Biosynthesis of secondary metabolites - Oryza sativa japonica (Japanese rice) (RefSeq);	IPR029063;	S-adenosyl-L-methionine-dependent methyltransferase;
B8B2Z6	probable thiol methyltransferase 2 isoform X1	Down	OsI_21722	8.4288	4	1	1	1	chloroplast	GO:0008152 metabolic process; GO:0032259 methylation;		GO:0008757 S-adenosylmethionine-dependent methyltransferase activity; GO:0016741 transferase activity, transferring one-carbon groups; GO:0008168 methyltransferase activity; GO:0003824 catalytic activity; GO:0016740 transferase activity;	K21552	HOL; methyl halide transferase [EC:2.1.1.165]		IPR029063;	S-adenosyl-L-methionine-dependent methyltransferase;
B8B315	rosmarinate synthase	Up	OsI_21698	11.611	10	4	4	4	chloroplast			GO:0016746 transferase activity, transferring acyl groups; GO:0016747 transferase activity, transferring acyl groups other than amino-acyl groups; GO:0003824 catalytic activity; GO:0016740 transferase activity;				IPR023213;	Chloramphenicol acetyltransferase-like domain;
B8B3F3	probable galactinol--sucrose galactosyltransferase 6	Up	OsI_21858	47.73	23	11	12	11	chloroplast			GO:0003824 catalytic activity;	K06617	E2.4.1.82; raffinose synthase [EC:2.4.1.82]	osa00052 Galactose metabolism - Oryza sativa japonica (Japanese rice) (RefSeq);	IPR013785; IPR017853;	Aldolase-type TIM barrel; Glycoside hydrolase superfamily;
B8B3F6	myb-like protein H [Setaria italica]	Up	OsI_21869	4.3061	5.7	1	1	1	nucleus		GO:0043226 organelle; GO:0043231 intracellular membrane-bounded organelle; GO:0043229 intracellular organelle; GO:0005634 nucleus; GO:0044464 cell part; GO:0005622 intracellular; GO:0044424 intracellular part; GO:0043227 membrane-bounded organelle; GO:0005623 cell;	GO:0097159 organic cyclic compound binding; GO:1901363 heterocyclic compound binding; GO:0003677 DNA binding; GO:0005488 binding; GO:0003676 nucleic acid binding;				IPR001005; IPR009057; IPR017884;	SANT/Myb domain; Homeobox domain-like; SANT domain;
B8B5X4	2-phosphoglycerate kinase [Medicago truncatula]	Up	OsI_25923	4.3286	15.2	6	7	1	nucleus							IPR027417;	P-loop containing nucleoside triphosphate hydrolase;
B8B705	kelch-like protein 12 isoform X1 [Brachypodium distachyon]	Down	OsI_26354	-2	1.1	1	1	1	chloroplast			GO:0005515 protein binding; GO:0005488 binding;				IPR015916; IPR013989;	Galactose oxidase, beta-propeller; Development/cell death domain;
B8B737	Uncharacterized protein OS=Oryza sativa subsp. indica OX=39946 GN=OsI_24818	Down	OsI_24818	4.3232	16	2	3	2	chloroplast		GO:0031224 intrinsic component of membrane; GO:0016020 membrane; GO:0016021 integral component of membrane; GO:0044425 membrane part;
B8B754	pathogenesis-related protein PRB1-3	Up	OsI_24759	3.1069	6	1	1	1	chloroplast		GO:0005576 extracellular region;		K13449	PR1; pathogenesis-related protein 1	osa04016 MAPK signaling pathway - plant - Oryza sativa japonica (Japanese rice) (RefSeq); osa04075 Plant hormone signal transduction - Oryza sativa japonica (Japanese rice) (RefSeq); osa04626 Plant-pathogen interaction - Oryza sativa japonica (Japanese rice) (RefSeq);	IPR034111; IPR014044;	Pathogenesis-related protein 1-like, SCP domain; CAP domain;
B8B7U0	40S ribosomal protein S13-2-like	Down	OsI_26563	14.262	37.1	5	8	4	mitochondria	GO:0006518 peptide metabolic process; GO:0043043 peptide biosynthetic process; GO:0044267 cellular protein metabolic process; GO:0006807 nitrogen compound metabolic process; GO:0009058 biosynthetic process; GO:0043603 cellular amide metabolic process; GO:0044238 primary metabolic process; GO:1901566 organonitrogen compound biosynthetic process; GO:1901576 organic substance biosynthetic process; G…	GO:0005840 ribosome; GO:0043226 organelle; GO:0043229 intracellular organelle; GO:0043232 intracellular non-membrane-bounded organelle; GO:0044464 cell part; GO:0005622 intracellular; GO:0005737 cytoplasm; GO:0032991 macromolecular complex; GO:0044424 intracellular part; GO:1990904 ribonucleoprotein complex; GO:0005623 cell; GO:0030529 intracellular ribonucleoprotein complex; GO:0044444 cytoplasm…	GO:0003735 structural constituent of ribosome; GO:0005198 structural molecule activity;	K02953	RP-S13e, RPS13; small subunit ribosomal protein S13e	osa03010 Ribosome - Oryza sativa japonica (Japanese rice) (RefSeq);	IPR012606; IPR009068;	Ribosomal protein S13/S15, N-terminal; S15/NS1, RNA-binding;
B8B8I7	40S ribosomal protein S2-3	Up	OsI_25329	22.358	77.1	9	27	3	cytoplasm	GO:0006518 peptide metabolic process; GO:0043043 peptide biosynthetic process; GO:0044267 cellular protein metabolic process; GO:0006807 nitrogen compound metabolic process; GO:0009058 biosynthetic process; GO:0043603 cellular amide metabolic process; GO:0044238 primary metabolic process; GO:1901566 organonitrogen compound biosynthetic process; GO:1901576 organic substance biosynthetic process; G…	GO:0005840 ribosome; GO:0043226 organelle; GO:0043229 intracellular organelle; GO:0043232 intracellular non-membrane-bounded organelle; GO:0044464 cell part; GO:0005622 intracellular; GO:0005737 cytoplasm; GO:0032991 macromolecular complex; GO:0044424 intracellular part; GO:1990904 ribonucleoprotein complex; GO:0005623 cell; GO:0030529 intracellular ribonucleoprotein complex; GO:0044444 cytoplasm…	GO:0003735 structural constituent of ribosome; GO:0005198 structural molecule activity;	K02981	RP-S2e, RPS2; small subunit ribosomal protein S2e	osa03010 Ribosome - Oryza sativa japonica (Japanese rice) (RefSeq);	IPR020568; IPR005324; IPR014721;	Ribosomal protein S5 domain 2-type fold; Ribosomal protein S5, C-terminal; Ribosomal protein S5 domain 2-type fold, subgroup;
B8B8W9	ubiquitin carboxyl-terminal hydrolase 1	Down	OsI_29978	4.2841	2	1	1	1	cytoplasm	GO:0070646 protein modification by small protein removal; GO:0044267 cellular protein metabolic process; GO:0070647 protein modification by small protein conjugation or removal; GO:0016579 protein deubiquitination; GO:0044238 primary metabolic process; GO:0044237 cellular metabolic process; GO:0071704 organic substance metabolic process; GO:0008152 metabolic process; GO:0044260 cellular macromole…		GO:0008233 peptidase activity; GO:0046914 transition metal ion binding; GO:0036459 thiol-dependent ubiquitinyl hydrolase activity; GO:0003824 catalytic activity; GO:0005488 binding; GO:0043167 ion binding; GO:0019783 ubiquitin-like protein-specific protease activity; GO:0070011 peptidase activity, acting on L-amino acid peptides; GO:0043169 cation binding; GO:0046872 metal ion binding; GO:0101005…				IPR001607; IPR013083; IPR028889; IPR001394;	Zinc finger, UBP-type; Zinc finger, RING/FYVE/PHD-type; Ubiquitin specific protease domain; Peptidase C19, ubiquitin carboxyl-terminal hydrolase;
B8BAU5	glucan endo-1,3-beta-glucosidase 10	Up	OsI_29271	1.708	2.6	1	1	1	chloroplast	GO:0008152 metabolic process; GO:0005975 carbohydrate metabolic process; GO:0044238 primary metabolic process; GO:0071704 organic substance metabolic process;		GO:0004553 hydrolase activity, hydrolyzing O-glycosyl compounds; GO:0016787 hydrolase activity; GO:0003824 catalytic activity; GO:0016798 hydrolase activity, acting on glycosyl bonds;				IPR017853; IPR013781;	Glycoside hydrolase superfamily; Glycoside hydrolase, catalytic domain;
B8BB31	mediator-associated protein 2 isoform X1	Up	OsI_29287	4.7914	12.8	3	4	1	nucleus
B8BBQ2	probable LRR receptor-like serine/threonine-protein kinase At1g56130 isoform X1	Down	OsI_28201	-2	1.5	1	1	1	vacuolar membrane	GO:0016310 phosphorylation; GO:0044267 cellular protein metabolic process; GO:0044238 primary metabolic process; GO:0044237 cellular metabolic process; GO:0006796 phosphate-containing compound metabolic process; GO:0071704 organic substance metabolic process; GO:0008152 metabolic process; GO:0006468 protein phosphorylation; GO:0006793 phosphorus metabolic process; GO:0044260 cellular macromolecul…	GO:0031224 intrinsic component of membrane; GO:0016020 membrane; GO:0016021 integral component of membrane; GO:0044425 membrane part;	GO:0005524 ATP binding; GO:1901265 nucleoside phosphate binding; GO:0016773 phosphotransferase activity, alcohol group as acceptor; GO:0001882 nucleoside binding; GO:0043167 ion binding; GO:0005515 protein binding; GO:0004672 protein kinase activity; GO:0000166 nucleotide binding; GO:0097159 organic cyclic compound binding; GO:1901363 heterocyclic compound binding; GO:0032549 ribonucleoside bindi…				IPR021720; IPR000719; IPR032675; IPR013320; IPR011009;	Malectin; Protein kinase domain; Leucine-rich repeat domain, L domain-like; Concanavalin A-like lectin/glucanase domain; Protein kinase-like domain;
B8BCC9	cyclin-dependent kinase B2-1	Up	OsI_29864	20.98	11.7	7	8	6	cytoskeleton	GO:0016310 phosphorylation; GO:0044267 cellular protein metabolic process; GO:0044238 primary metabolic process; GO:0044237 cellular metabolic process; GO:0006796 phosphate-containing compound metabolic process; GO:0071704 organic substance metabolic process; GO:0008152 metabolic process; GO:0006468 protein phosphorylation; GO:0006793 phosphorus metabolic process; GO:0044260 cellular macromolecul…		GO:0005524 ATP binding; GO:1901265 nucleoside phosphate binding; GO:0016773 phosphotransferase activity, alcohol group as acceptor; GO:0001882 nucleoside binding; GO:0043167 ion binding; GO:0004672 protein kinase activity; GO:0000166 nucleotide binding; GO:0097159 organic cyclic compound binding; GO:1901363 heterocyclic compound binding; GO:0032549 ribonucleoside binding; GO:0097367 carbohydrate …				IPR000719; IPR011009;	Protein kinase domain; Protein kinase-like domain;
B8BD21	cinnamoyl-CoA reductase 2	Down	OsI_31867	1.754	2.3	1	1	1	chloroplast			GO:0048037 cofactor binding; GO:0003824 catalytic activity; GO:0005488 binding; GO:0050662 coenzyme binding;				IPR001509; IPR016040;	NAD-dependent epimerase/dehydratase; NAD(P)-binding domain;
B8BDB2	Purple acid phosphatase OS=Oryza sativa subsp. indica OX=39946 GN=OsI_31957	Down	OsI_31957	13.121	11.4	8	14	4	chloroplast	GO:0008152 metabolic process; GO:0016311 dephosphorylation; GO:0044237 cellular metabolic process; GO:0006793 phosphorus metabolic process; GO:0009987 cellular process; GO:0006796 phosphate-containing compound metabolic process;		GO:0003993 acid phosphatase activity; GO:0042578 phosphoric ester hydrolase activity; GO:0003824 catalytic activity; GO:0016791 phosphatase activity; GO:0005488 binding; GO:0016788 hydrolase activity, acting on ester bonds; GO:0043167 ion binding; GO:0043169 cation binding; GO:0046872 metal ion binding; GO:0016787 hydrolase activity;	K22390			IPR029052; IPR015914; IPR004843; IPR025733; IPR008963;	Metallo-dependent phosphatase-like; Purple acid phosphatase, N-terminal; Calcineurin-like phosphoesterase domain, ApaH type; Iron/zinc purple acid phosphatase-like C-terminal domain; Purple acid phosphatase-like, N-terminal;
B8BDV9	E3 ubiquitin ligase BIG BROTHER-related	Up	OsI_32172	16.42	18.5	4	5	4	mitochondria			GO:0043169 cation binding; GO:0046872 metal ion binding; GO:0005515 protein binding; GO:0008270 zinc ion binding; GO:0046914 transition metal ion binding; GO:0005488 binding; GO:0043167 ion binding;	K19045	BB; E3 ubiquitin-protein ligase BIG BROTHER and related proteins [EC:2.3.2.27]		IPR001841; IPR013083;	Zinc finger, RING-type; Zinc finger, RING/FYVE/PHD-type;
B8BDY2	histidine phosphatase family (branch 1) protein [Medicago truncatula]	Up	OsI_30728	8.6084	15.7	3	3	3	chloroplast		GO:0043226 organelle; GO:0043231 intracellular membrane-bounded organelle; GO:0043229 intracellular organelle; GO:0044464 cell part; GO:0005622 intracellular; GO:0005737 cytoplasm; GO:0044424 intracellular part; GO:0043227 membrane-bounded organelle; GO:0005623 cell; GO:0009536 plastid; GO:0044444 cytoplasmic part; GO:0009507 chloroplast;
B8BGB0	Beta-galactosidase OS=Oryza sativa subsp. indica OX=39946 GN=OsI_33138	Up	OsI_33138	196.4	40.5	26	55	26	extracellular	GO:0008152 metabolic process; GO:0005975 carbohydrate metabolic process; GO:0044238 primary metabolic process; GO:0071704 organic substance metabolic process;		GO:0015925 galactosidase activity; GO:0003824 catalytic activity; GO:0005488 binding; GO:0016798 hydrolase activity, acting on glycosyl bonds; GO:0030246 carbohydrate binding; GO:0004553 hydrolase activity, hydrolyzing O-glycosyl compounds; GO:0016787 hydrolase activity; GO:0004565 beta-galactosidase activity;				IPR031330; IPR000922; IPR017853; IPR013781; IPR008979;	Glycoside hydrolase 35, catalytic domain; D-galactoside/L-rhamnose binding SUEL lectin domain; Glycoside hydrolase superfamily; Glycoside hydrolase, catalytic domain; Galactose-binding domain-like;
B8BGU4	chitinase 2	Down	OsI_33580	7.7415	6.2	2	2	1	chloroplast	GO:0008152 metabolic process; GO:0005975 carbohydrate metabolic process; GO:0044238 primary metabolic process; GO:0071704 organic substance metabolic process;						IPR029058; IPR017853; IPR013781;	Alpha/Beta hydrolase fold; Glycoside hydrolase superfamily; Glycoside hydrolase, catalytic domain;
B8BGV3	perakine reductase	Down	OsI_33599	39.285	36.7	11	12	10	cytoplasm							IPR023210;	NADP-dependent oxidoreductase domain;
B8BHH8	uncharacterized membrane protein At1g06890	Down	OsI_34048	3.0666	3.8	1	1	1	chloroplast		GO:0031224 intrinsic component of membrane; GO:0016020 membrane; GO:0016021 integral component of membrane; GO:0044425 membrane part;		K15285	SLC35E3; solute carrier family 35, member E3
B8BHM5	protein TIC110, chloroplastic	Up	OsI_34144	15.598	9.6	4	5	4	chloroplast		GO:0043226 organelle; GO:0043231 intracellular membrane-bounded organelle; GO:0043229 intracellular organelle; GO:0044464 cell part; GO:0005622 intracellular; GO:0005737 cytoplasm; GO:0044424 intracellular part; GO:0043227 membrane-bounded organelle; GO:0005623 cell; GO:0009536 plastid; GO:0044444 cytoplasmic part; GO:0009507 chloroplast;
B8BHR4	tetraspanin-10	Up	OsI_34231	4.5391	7.8	2	2	2	plasma membrane		GO:0031224 intrinsic component of membrane; GO:0016020 membrane; GO:0016021 integral component of membrane; GO:0044425 membrane part;
B8BHT2	Methionine aminopeptidase OS=Oryza sativa subsp. indica OX=39946 GN=OsI_34265	Up	OsI_34265	113.9	52.6	15	21	15	cytoplasm	GO:0006508 proteolysis; GO:0008152 metabolic process; GO:0043170 macromolecule metabolic process; GO:0019538 protein metabolic process; GO:0044238 primary metabolic process; GO:0071704 organic substance metabolic process;	GO:0044464 cell part; GO:0005622 intracellular; GO:0005737 cytoplasm; GO:0044424 intracellular part; GO:0005829 cytosol; GO:0005623 cell; GO:0044444 cytoplasmic part;	GO:0008238 exopeptidase activity; GO:0008233 peptidase activity; GO:0003824 catalytic activity; GO:0005488 binding; GO:0008235 metalloexopeptidase activity; GO:0043167 ion binding; GO:0043169 cation binding; GO:0046872 metal ion binding; GO:0070011 peptidase activity, acting on L-amino acid peptides; GO:0008237 metallopeptidase activity; GO:0004177 aminopeptidase activity; GO:0016787 hydrolase ac…	K01265	map; methionyl aminopeptidase [EC:3.4.11.18]		IPR000994; IPR031615;	Peptidase M24; MYND-like zinc finger, mRNA-binding;
B8BHW0	trihelix transcription factor GT-2-like [Gossypium arboreum]	Up	OsI_34323	31.594	10.8	6	6	4	nucleus			GO:0097159 organic cyclic compound binding; GO:1901363 heterocyclic compound binding; GO:0003677 DNA binding; GO:0005488 binding; GO:0003676 nucleic acid binding;				IPR001005; IPR009057; IPR017877;	SANT/Myb domain; Homeobox domain-like; Myb-like domain;
B8BIC4	Eukaryotic translation initiation factor 3 subunit B OS=Oryza sativa subsp. indica OX=39946 GN=OsI_34716	Up	OsI_34716	276.78	39.9	27	51	27	nucleus	GO:0050794 regulation of cellular process; GO:0044085 cellular component biogenesis; GO:0016043 cellular component organization; GO:0022613 ribonucleoprotein complex biogenesis; GO:0006518 peptide metabolic process; GO:0022618 ribonucleoprotein complex assembly; GO:0060255 regulation of macromolecule metabolic process; GO:0010608 posttranscriptional regulation of gene expression; GO:0044267 cellu…	GO:0044464 cell part; GO:0005622 intracellular; GO:0070993 translation preinitiation complex; GO:0005737 cytoplasm; GO:0016282 eukaryotic 43S preinitiation complex; GO:0032991 macromolecular complex; GO:0044424 intracellular part; GO:1990904 ribonucleoprotein complex; GO:0043234 protein complex; GO:0030529 intracellular ribonucleoprotein complex; GO:0005623 cell; GO:0033290 eukaryotic 48S preinit…	GO:0097159 organic cyclic compound binding; GO:1901363 heterocyclic compound binding; GO:0008135 translation factor activity, RNA binding; GO:0003723 RNA binding; GO:1901265 nucleoside phosphate binding; GO:0031369 translation initiation factor binding; GO:0005488 binding; GO:0003676 nucleic acid binding; GO:0003743 translation initiation factor activity; GO:0005515 protein binding; GO:0000166 nu…	K03253	EIF3B; translation initiation factor 3 subunit B	osa03013 RNA transport - Oryza sativa japonica (Japanese rice) (RefSeq);	IPR000504; IPR013979; IPR015943; IPR012677; IPR034363; IPR011042;	RNA recognition motif domain; Translation initiation factor, beta propellor-like domain; WD40/YVTN repeat-like-containing domain; Nucleotide-binding alpha-beta plait domain; eIF3B, RNA recognition motif; Six-bladed beta-propeller, TolB-like;
B8BIU8	Mini zinc finger protein 1 OS=Oryza sativa subsp. indica OX=39946 GN=MIF1	Up	MIF1	24.081	40	2	2	2	chloroplast		GO:0044424 intracellular part; GO:0005623 cell; GO:0044464 cell part; GO:0005622 intracellular; GO:0005737 cytoplasm;	GO:0046872 metal ion binding; GO:0043169 cation binding; GO:0005488 binding; GO:0043167 ion binding;				IPR006456;	ZF-HD homeobox protein, Cys/His-rich dimerisation domain;
B8BL22	long chain acyl-CoA synthetase 2	Up	OsI_36493	3.2823	28.5	13	23	1	chloroplast	GO:0008152 metabolic process;		GO:0003824 catalytic activity;	K01897	ACSL, fadD; long-chain acyl-CoA synthetase [EC:6.2.1.3]	osa00061 Fatty acid biosynthesis - Oryza sativa japonica (Japanese rice) (RefSeq); osa00071 Fatty acid degradation - Oryza sativa japonica (Japanese rice) (RefSeq); osa01100 Metabolic pathways - Oryza sativa japonica (Japanese rice) (RefSeq); osa01212 Fatty acid metabolism - Oryza sativa japonica (Japanese rice) (RefSeq); osa04146 Peroxisome - Oryza sativa japonica (Japanese rice) (RefSeq);	IPR025110; IPR000873;	AMP-binding enzyme C-terminal domain; AMP-dependent synthetase/ligase;
B8BLL1	Uncharacterized protein OS=Oryza sativa subsp. indica OX=39946 GN=OsI_36852	Up	OsI_36852	-2	3.2	1	1	1	chloroplast		GO:0031224 intrinsic component of membrane; GO:0016020 membrane; GO:0016021 integral component of membrane; GO:0044425 membrane part;
B8BM92	Peroxidase OS=Oryza sativa subsp. indica OX=39946 GN=OsI_38572	Down	OsI_38572	10.094	11	4	5	3	chloroplast	GO:0006950 response to stress; GO:0055114 oxidation-reduction process; GO:0009636 response to toxic substance; GO:0044699 single-organism process; GO:0050896 response to stimulus; GO:0044237 cellular metabolic process; GO:0008152 metabolic process; GO:0042221 response to chemical; GO:1990748 cellular detoxification; GO:0042743 hydrogen peroxide metabolic process; GO:0072593 reactive oxygen specie…	GO:0005576 extracellular region;	GO:0097159 organic cyclic compound binding; GO:1901363 heterocyclic compound binding; GO:0020037 heme binding; GO:0003824 catalytic activity; GO:0005488 binding; GO:0043167 ion binding; GO:0016209 antioxidant activity; GO:0043169 cation binding; GO:0046872 metal ion binding; GO:0004601 peroxidase activity; GO:0046906 tetrapyrrole binding; GO:0016491 oxidoreductase activity; GO:0016684 oxidoreduct…	K00430	E1.11.1.7; peroxidase [EC:1.11.1.7]	osa00940 Phenylpropanoid biosynthesis - Oryza sativa japonica (Japanese rice) (RefSeq); osa01100 Metabolic pathways - Oryza sativa japonica (Japanese rice) (RefSeq); osa01110 Biosynthesis of secondary metabolites - Oryza sativa japonica (Japanese rice) (RefSeq);	IPR033905; IPR002016;	Secretory peroxidase; Haem peroxidase, plant/fungal/bacterial;
B8BMA3	60S ribosomal protein L37 [Zea mays]	Down	OsI_38587	3.2034	2.7	1	1	1	nucleus
B8BMF9	Pathogenesis-related protein OS=Oryza sativa subsp. indica OX=39946 GN=PR10a	Up	PR10a	33.439	63.8	8	13	8	cytoplasm							IPR023393;	START-like domain;
B8BMG2	major pollen allergen Bet v 1-D/H	Up	OsI_38689	3.6735	33.3	11	24	1	cytoplasm	GO:0006952 defense response; GO:0050896 response to stimulus; GO:0006950 response to stress; GO:0009607 response to biotic stimulus;						IPR023393; IPR000916;	START-like domain; Bet v I/Major latex protein;
B8BMV2	putative uridine kinase C227.14	Down	OsI_39000	14.568	11.7	3	3	3	chloroplast	GO:0016310 phosphorylation; GO:0008152 metabolic process; GO:0044237 cellular metabolic process; GO:0006793 phosphorus metabolic process; GO:0009987 cellular process; GO:0006796 phosphate-containing compound metabolic process;	GO:0043226 organelle; GO:0043231 intracellular membrane-bounded organelle; GO:0043229 intracellular organelle; GO:0044464 cell part; GO:0005622 intracellular; GO:0005737 cytoplasm; GO:0044424 intracellular part; GO:0043227 membrane-bounded organelle; GO:0005623 cell; GO:0009536 plastid; GO:0044444 cytoplasmic part; GO:0009507 chloroplast;	GO:0005524 ATP binding; GO:1901265 nucleoside phosphate binding; GO:0001882 nucleoside binding; GO:0043167 ion binding; GO:0000166 nucleotide binding; GO:0097159 organic cyclic compound binding; GO:1901363 heterocyclic compound binding; GO:0032549 ribonucleoside binding; GO:0097367 carbohydrate derivative binding; GO:0016301 kinase activity; GO:0003824 catalytic activity; GO:0032553 ribonucleotid…				IPR006083; IPR027417;	Phosphoribulokinase/uridine kinase; P-loop containing nucleoside triphosphate hydrolase;
B8BN20	protein IQ-DOMAIN 1 isoform X1	Down	OsI_39148	2.5103	2.5	1	1	1	nucleus			GO:0005515 protein binding; GO:0005488 binding;				IPR027417;	P-loop containing nucleoside triphosphate hydrolase;
B8BPG2	Bifunctional dihydrofolate reductase-thymidylate synthase OS=Oryza sativa subsp. indica OX=39946 GN=OsI_38205	Up	OsI_38205	18.79	11.3	5	8	4	cytoskeleton	GO:0051188 cofactor biosynthetic process; GO:0042559 pteridine-containing compound biosynthetic process; GO:0016053 organic acid biosynthetic process; GO:0009130 pyrimidine nucleoside monophosphate biosynthetic process; GO:0009117 nucleotide metabolic process; GO:0009157 deoxyribonucleoside monophosphate biosynthetic process; GO:0042398 cellular modified amino acid biosynthetic process; GO:004469…		GO:0016645 oxidoreductase activity, acting on the CH-NH group of donors; GO:0016646 oxidoreductase activity, acting on the CH-NH group of donors, NAD or NADP as acceptor; GO:0008168 methyltransferase activity; GO:0004799 thymidylate synthase activity; GO:0003824 catalytic activity; GO:0004146 dihydrofolate reductase activity; GO:0016741 transferase activity, transferring one-carbon groups; GO:001…	K13998	DHFR-TS; dihydrofolate reductase / thymidylate synthase [EC:1.5.1.3 2.1.1.45]	osa00240 Pyrimidine metabolism - Oryza sativa japonica (Japanese rice) (RefSeq); osa00670 One carbon pool by folate - Oryza sativa japonica (Japanese rice) (RefSeq); osa00790 Folate biosynthesis - Oryza sativa japonica (Japanese rice) (RefSeq); osa01100 Metabolic pathways - Oryza sativa japonica (Japanese rice) (RefSeq);	IPR001796; IPR023451; IPR024072;	Dihydrofolate reductase domain; Thymidylate synthase/dCMP hydroxymethylase domain; Dihydrofolate reductase-like domain;
